# Supplementary material for: Fasting Insulin and Risk of Overall and 14 Site-Specific Cancers: Evidence From Genetic Data
Source: Front Oncol. 2022 Apr 21;12:863340. doi: 10.3389/fonc.2022.863340 (PMC9069016; doi:10.3389/fonc.2022.863340)
Supplement: Supplementary file 2 [file DataSheet_2.xlsx]

## Sheet: Table S1
Supplementary Table 1. SNPs used as instrumental variable for glycemic traits and T2DM
Trait	Chr	Pos (bp)	rsID	Effect Allele	Other Allele	EAF	Effect	SE	P-value	R2	F
FI	3	52844534	rs17331151	T	C	0.1084	-0.0162	0.0031	1.524e-08	5.07294e-05	14.2768
FI	6	43809802	rs9472135	T	C	0.7008	0.011	0.0022	4.213e-08	5.07424e-05	14.2804
FI	11	63869062	rs2845885	T	C	0.9342	-0.0204	0.0039	1.18e-08	5.1163e-05	14.3988
FI	10	114758349	rs7903146	T	C	0.2717	-0.0116	0.0021	1.237e-09	5.32532e-05	14.9871
FI	7	130466854	rs972283	A	G	0.4739	-0.0105	0.0019	1.093e-08	5.49748e-05	15.4716
FI	10	89764490	rs12769346	T	G	0.864	-0.0154	0.0028	1.197e-08	5.57345e-05	15.6855
FI	7	130429186	rs13234269	A	T	0.4793	-0.0108	0.0019	1.272e-08	5.822e-05	16.385
FI	8	23615445	rs13258890	T	C	0.7651	0.0128	0.0025	2.765e-08	5.88913e-05	16.5739
FI	7	50786663	rs2108349	A	G	0.655	-0.0115	0.002	1.133e-08	5.97704e-05	16.8213
FI	12	66351826	rs1351394	T	C	0.4943	-0.0111	0.0018	2.708e-09	6.1597e-05	17.3354
FI	12	124481690	rs7975482	A	G	0.6744	0.0119	0.002	1.973e-10	6.21908e-05	17.5026
FI	20	45582472	rs1206760	A	G	0.5447	-0.0112	0.0019	8.821e-10	6.22187e-05	17.5104
FI	3	123065778	rs11708067	A	G	0.7816	-0.0135	0.0023	1.299e-09	6.22207e-05	17.511
FI	2	630902	rs77935490	A	T	0.2119	0.0137	0.0026	1.067e-08	6.26879e-05	17.6425
FI	12	66371880	rs7968682	T	G	0.511	0.0113	0.0019	3.171e-09	6.38141e-05	17.9595
FI	19	33899065	rs731839	A	G	0.664	-0.0121	0.0019	3.865e-11	6.53293e-05	18.3859
FI	4	145659064	rs11727676	T	C	0.9127	-0.0203	0.0039	2.898e-08	6.56696e-05	18.4817
FI	4	89726283	rs2276936	A	C	0.5038	-0.0116	0.0018	4.254e-11	6.72761e-05	18.9338
FI	4	157670537	rs6855363	T	C	0.6811	0.0125	0.002	4.039e-08	6.78759e-05	19.1027
FI	6	164133001	rs4709746	T	C	0.1274	-0.0177	0.0033	2.965e-08	6.96564e-05	19.6038
FI	12	124409502	rs7133378	A	G	0.3165	-0.0127	0.002	5.996e-11	6.9783e-05	19.6394
FI	9	136137657	rs8176693	T	C	0.0979	0.02	0.0034	1.103e-10	7.06525e-05	19.8841
FI	4	89739808	rs3775380	A	G	0.5048	-0.0119	0.0018	1.477e-11	7.07985e-05	19.9252
FI	20	45581777	rs1999536	C	G	0.5496	-0.012	0.002	1.324e-09	7.12915e-05	20.064
FI	19	33894846	rs10422861	T	C	0.6656	-0.0127	0.0021	6.646e-11	7.17988e-05	20.2068
FI	6	164126233	rs73013411	A	C	0.1282	-0.018	0.0032	2.084e-08	7.24236e-05	20.3826
FI	4	106106353	rs10010325	A	C	0.4766	0.0121	0.0019	4.05e-11	7.30447e-05	20.5574
FI	12	21696684	rs2054435	A	G	0.2196	-0.0147	0.0026	9.501e-09	7.40652e-05	20.8447
FI	4	106081636	rs9884482	T	C	0.6099	-0.0125	0.0019	2.879e-11	7.43506e-05	20.925
FI	3	150066540	rs62271373	A	T	0.0607	0.0256	0.0048	1.596e-08	7.47314e-05	21.0322
FI	6	43757896	rs998584	A	C	0.485	0.0123	0.0019	2.314e-10	7.55769e-05	21.2702
FI	3	49884261	rs9819511	T	C	0.2962	0.0137	0.0022	2.259e-08	7.82538e-05	22.0236
FI	9	136132954	rs75179845	T	C	0.9064	-0.0216	0.0035	6.051e-11	7.9165e-05	22.2801
FI	12	21699928	rs6487237	A	C	0.7785	0.0154	0.0026	4.682e-09	8.17907e-05	23.0191
FI	12	102912558	rs35747	A	G	0.8211	0.0169	0.0025	2.679e-11	8.39092e-05	23.6154
FI	8	9021933	rs330945	T	C	0.631	0.0141	0.0021	1.824e-11	9.25814e-05	26.0563
FI	12	102898446	rs860598	A	G	0.8197	0.0177	0.0025	6.879e-12	9.26035e-05	26.0625
FI	21	24493294	rs200678953	T	TATATGTTATATAC	0.374	0.0142	0.0029	2.04e-08	9.44175e-05	26.5731
FI	10	89680631	rs118164457	T	C	0.957	-0.0345	0.0057	3.858e-10	9.796e-05	27.5702
FI	18	60845884	rs12454712	T	C	0.5804	0.0142	0.0025	1.777e-09	9.82131e-05	27.6415
FI	5	55860781	rs3936511	A	G	0.8243	-0.0187	0.0025	2.812e-14	0.000101291	28.5078
FI	6	127452935	rs2745353	T	C	0.5166	0.0146	0.0018	4.63e-16	0.000106463	29.9634
FI	6	127449246	rs1474696	A	G	0.4863	-0.0147	0.0018	3.019e-16	0.000107964	30.386
FI	3	12116620	rs308971	A	G	0.8711	-0.0224	0.0029	3.907e-13	0.00011268	31.7135
FI	5	53272664	rs4865796	A	G	0.6807	0.0165	0.002	7.329e-17	0.000118346	33.3083
FI	5	55806751	rs459193	A	G	0.2666	-0.0181	0.0021	1.123e-18	0.000128112	36.0573
FI	6	34236973	rs2780215	A	G	0.9555	0.0392	0.0063	1.064e-09	0.000130675	36.7789
FI	8	9183596	rs4841132	A	G	0.1078	0.0264	0.0032	3.83e-20	0.000134066	37.7334
FI	6	34222201	rs116141873	T	G	0.0399	0.0428	0.0059	1.423e-11	0.000140348	39.5018
FI	1	219628973	rs6674544	A	G	0.57	0.0177	0.002	6.973e-21	0.000153575	43.225
FI	3	12351521	rs35000407	T	G	0.863	0.0258	0.0028	1.504e-21	0.000157399	44.3014
FI	2	165508300	rs6713419	T	C	0.6307	0.0185	0.0019	1.441e-24	0.000159432	44.8739
FI	12	48202696	rs111264094	C	G	0.9747	0.0569	0.0093	1.642e-09	0.000159678	44.9432
FI	2	165518799	rs75265117	C	G	0.8759	0.0284	0.0029	1.543e-24	0.000175345	49.3535
FI	3	12344730	rs11712037	C	G	0.8653	0.0278	0.0029	2.096e-21	0.000180158	50.7085
FI	2	165528624	rs1128249	T	G	0.3919	-0.0199	0.0019	7.711e-28	0.00018875	53.1272
FI	2	165528876	rs13389219	T	C	0.392	-0.0199	0.0019	5.838e-28	0.000188767	53.132
FI	8	9173209	rs7012637	A	G	0.4781	-0.0215	0.0019	1.482e-29	0.000230682	64.9325
FI	8	9173358	rs7012814	A	G	0.4758	-0.0219	0.0019	8.342e-30	0.000239243	67.343
FI	2	27730940	rs1260326	T	C	0.3928	-0.0231	0.0019	8.418e-38	0.000254541	71.6501
FI	2	227101309	rs2972145	T	C	0.3693	-0.0247	0.0019	6.075e-38	0.000284201	80.0015
FI	2	227099534	rs2943646	A	G	0.3706	-0.025	0.0019	8.473e-39	0.00029157	82.0763
2hGlu	11	17415190	rs4148646	C	G	0.4	0.04	0.008	4.39e-08	0.001	212.277
2hGlu	2	165558252	rs12692738	T	C	0.76	0.049	0.009	2.72e-08	0.001	239.826
2hGlu	14	38842759	rs112824462	A	G	0.25	-0.058	0.01	6.73e-09	0.001	358.446
2hGlu	8	9183596	rs4841132	A	G	0.11	-0.071	0.013	3.13e-09	0.001	271.724
2hGlu	12	121380544	rs2649999	T	C	0.36	0.05	0.008	2.01e-10	0.001	323.741
2hGlu	8	9202317	rs200250298	A	AAGG	0.1	-0.089	0.015	1.89e-10	0.001	384.609
2hGlu	9	136146597	rs550057	T	C	0.28	0.053	0.009	3.62e-11	0.001	315.855
2hGlu	3	185526062	rs7630554	A	G	0.7	-0.056	0.008	1.56e-11	0.001	370.861
2hGlu	3	185520085	rs144346724	G	GTGTTCTTGACTAACCAAGACA	0.72	-0.061	0.009	1.02e-11	0.001	416.083
2hGlu	2	27730940	rs1260326	T	C	0.4	0.049	0.008	5.93e-12	0.001	318.242
2hGlu	17	7129898	rs72839768	A	G	0.02	0.244	0.036	4.53e-12	0.002	667.996
2hGlu	17	7185779	rs117643180	A	C	0.03	0.234	0.033	7.31e-14	0.003	767.915
2hGlu	15	62330633	rs11634163	T	C	0.42	0.058	0.008	3.29e-14	0.002	468.78
2hGlu	15	62332980	rs17271305	A	G	0.58	-0.059	0.008	2.88e-14	0.002	473.525
2hGlu	3	123065778	rs11708067	A	G	0.78	0.087	0.009	1.98e-22	0.003	729.531
2hGlu	19	46182304	rs10423928	A	T	0.22	0.1	0.01	8.64e-26	0.003	958.272
2hGlu	19	46181392	rs1800437	C	G	0.22	0.1	0.01	4.79e-26	0.003	968.255
2hGlu	10	114758349	rs7903146	T	C	0.26	0.085	0.009	2.79e-26	0.003	800.04
2hGlu	7	44231778	rs2971669	T	C	0.21	0.103	0.01	3.82e-28	0.004	990.549
2hGlu	7	44255643	rs878521	A	G	0.24	0.099	0.009	1.25e-28	0.004	1017.25
FG	11	92708710	rs10830963	C	G	0.71	-0.077	0.002	1.43E-321	0.00242996	685.49
FG	2	169763148	rs560887	T	C	0.3	-0.075	0.002	3.43e-367	0.00235208	663.469
FG	2	169757541	rs573225	A	G	0.68	0.069	0.002	3.98e-334	0.00208901	589.106
FG	2	169774071	rs563694	A	C	0.65	0.066	0.002	8.90E-321	0.00198224	558.938
FG	11	92697981	rs10466351	T	C	0.38	0.056	0.002	1.14e-205	0.00147511	415.729
FG	2	169754123	rs111485380	T	C	0.83	0.07	0.003	1.02e-137	0.0013769	388.012
FG	11	92679778	rs11523890	T	C	0.34	0.052	0.002	6.75e-161	0.00121317	341.817
FG	7	44255643	rs878521	A	G	0.24	0.055	0.002	2.65e-174	0.00111319	313.615
FG	11	92698427	rs10830962	C	G	0.6	-0.048	0.002	6.62e-156	0.00110396	311.014
FG	11	92671744	rs7113297	T	C	0.21	0.057	0.003	7.09e-100	0.00109064	307.256
FG	7	44229068	rs1799884	T	C	0.17	0.062	0.002	2.51e-167	0.0010551	297.233
FG	2	169757354	rs1402837	T	C	0.22	0.056	0.002	5.38e-162	0.00105435	297.023
FG	7	44226101	rs2971670	T	C	0.17	0.061	0.002	1.88e-165	0.00104096	293.246
FG	7	44231886	rs6975024	T	C	0.84	-0.062	0.002	4.66e-167	0.00103814	292.451
FG	7	44234737	rs2908286	T	C	0.17	0.061	0.002	1.88e-165	0.00103757	292.289
FG	2	169766560	rs17539351	T	C	0.12	-0.068	0.003	5.86e-123	0.000948267	267.109
FG	7	44231216	rs3757840	T	G	0.49	0.042	0.002	5.94e-133	0.000865064	243.652
FG	2	169800434	rs199666154	G	GT	0.73	-0.044	0.003	1.52e-64	0.000742779	209.184
FG	7	44211337	rs2971671	T	C	0.77	-0.043	0.002	1.24e-104	0.000641611	180.674
FG	2	169786707	rs56100844	T	G	0.98	0.118	0.01	9.82e-35	0.00052977	149.164
FG	2	169776141	rs114764002	A	T	0.97	0.092	0.007	3.41e-43	0.000474516	133.599
FG	11	92708961	rs79354397	T	C	0.97	-0.081	0.006	4.82e-45	0.000431575	121.504
FG	2	169768891	rs13430620	A	C	0.96	0.073	0.006	3.43e-40	0.000390419	109.912
FG	2	27730940	rs1260326	T	C	0.39	-0.028	0.002	4.48e-65	0.000377383	106.241
FG	2	27742603	rs780093	T	C	0.38	-0.028	0.002	1.53e-59	0.000369458	104.009
FG	8	118204020	rs9650069	T	C	0.32	-0.029	0.002	8.31e-58	0.000356329	100.312
FG	8	118184783	rs13266634	T	C	0.32	-0.029	0.002	4.81e-57	0.000355633	100.116
FG	7	15064190	rs10228796	C	G	0.48	-0.026	0.002	7.28e-52	0.000339903	95.686
FG	7	15063430	rs10487796	A	T	0.48	-0.026	0.002	4.62e-52	0.000339794	95.6553
FG	2	169792188	rs3755158	C	G	0.89	-0.04	0.003	4.83e-49	0.000308898	86.9552
FG	11	45912013	rs7115753	A	G	0.46	0.024	0.002	2.83e-39	0.000293051	82.4929
FG	7	15053878	rs2191346	C	G	0.46	-0.024	0.002	1.51e-43	0.000283353	79.7621
FG	11	45870177	rs10838524	A	G	0.45	0.024	0.002	1.56e-40	0.000280844	79.0555
FG	3	123065778	rs11708067	A	G	0.77	0.028	0.002	1.63e-43	0.000278226	78.3184
FG	10	114754071	rs34872471	T	C	0.72	-0.026	0.002	5.41e-35	0.000276309	77.7786
FG	10	114758349	rs7903146	T	C	0.27	0.026	0.002	2e-35	0.000265479	74.7292
FG	5	95696585	rs1820176	T	C	0.71	0.025	0.002	1.91e-34	0.000252204	70.9917
FG	10	114753259	rs61875120	T	C	0.79	-0.027	0.002	1.93e-32	0.0002479	69.7799
FG	5	95703329	rs6876986	C	G	0.29	-0.024	0.002	3.07e-33	0.000242632	68.2966
FG	7	14919852	rs10281892	A	G	0.82	-0.028	0.002	2.09e-35	0.000236544	66.5826
FG	15	62391608	rs7163757	T	C	0.45	-0.022	0.002	2.64e-36	0.000233193	65.6391
FG	2	169765277	rs145353824	A	C	0.98	-0.076	0.009	7.21e-18	0.000214206	60.2936
FG	20	22562326	rs3833331	A	AG	0.95	0.045	0.005	1.92e-22	0.000198863	55.9739
FG	11	47293799	rs10501320	C	G	0.25	-0.022	0.002	1.09e-29	0.000180714	50.8646
FG	9	4291928	rs10974438	A	C	0.64	-0.02	0.002	9.85e-31	0.000180696	50.8595
FG	20	22567608	rs1337918	A	C	0.04	-0.046	0.005	2.3e-22	0.000178015	50.1048
FG	10	113036354	rs12784552	A	G	0.91	0.033	0.003	2.86e-31	0.000177654	50.0031
FG	10	113032095	rs35011531	T	C	0.09	-0.033	0.003	4.26e-31	0.000176766	49.7532
FG	9	4283137	rs1574285	T	G	0.59	-0.019	0.002	6.85e-30	0.00017154	48.2822
FG	11	47340680	rs10717442	A	AT	0.23	0.022	0.002	5.13e-18	0.000167702	47.2017
FG	11	72460694	rs11603349	T	C	0.82	0.024	0.002	3.12e-25	0.000165836	46.6763
FG	6	39046794	rs10305492	A	G	0.014	-0.076	0.01	7.5e-16	0.00016525	46.5114
FG	3	170709193	rs1604038	T	C	0.29	-0.02	0.002	4.47e-28	0.000161836	45.5503
FG	8	9173209	rs7012637	A	G	0.47	-0.018	0.002	9.75e-25	0.000161555	45.4712
FG	11	72460398	rs77464186	A	C	0.82	0.023	0.002	3.5e-25	0.000160574	45.1949
FG	20	22557099	rs6113722	A	G	0.04	-0.042	0.004	7.66e-25	0.00015419	43.398
FG	7	44235694	rs138917529	A	T	0.98	0.06	0.007	4.08e-17	0.000149279	42.0154
FG	8	9183358	rs9987289	A	G	0.1	0.028	0.003	3.57e-23	0.000148081	41.6783
FG	8	9183596	rs4841132	A	G	0.1	0.028	0.003	1.72e-22	0.000144824	40.7614
FG	3	170724091	rs3215234	G	GT	0.87	0.025	0.003	6.5e-24	0.000144597	40.6976
FG	9	22134068	rs10811660	A	G	0.18	-0.022	0.002	7.94e-25	0.000144302	40.6146
FG	9	4285119	rs57884925	C	G	0.51	-0.017	0.002	4e-24	0.000137715	38.7601
FG	2	169764176	rs492594	C	G	0.46	0.016	0.002	7.36e-24	0.000133755	37.6457
FG	2	169813318	rs114691375	A	T	0.03	0.045	0.006	7.79e-17	0.000132298	37.2355
FG	11	61609750	rs174583	T	C	0.36	-0.017	0.002	3.37e-22	0.000129786	36.5283
FG	6	20680678	rs9348441	A	T	0.28	0.018	0.002	4.4e-20	0.000125627	35.3576
FG	1	214154719	rs2075423	T	G	0.37	-0.016	0.002	3.18e-21	0.000120558	33.9309
FG	1	214159256	rs340874	T	C	0.47	-0.015	0.002	2.58e-20	0.000118264	33.2852
FG	11	47820241	rs34228231	A	G	0.23	-0.018	0.002	1.32e-18	0.000112025	31.5288
FG	9	139256766	rs3829109	A	G	0.3	-0.016	0.002	1.09e-15	0.000111992	31.5196
FG	7	50786663	rs2108349	A	G	0.66	-0.016	0.002	1.25e-15	0.000111326	31.3321
FG	3	141094338	rs75098673	T	C	0.05	-0.035	0.005	2.31e-11	0.000108627	30.5726
FG	6	7250270	rs3778321	A	G	0.19	-0.019	0.002	3.16e-17	0.000107128	30.1507
FG	12	133063768	rs11610045	A	G	0.5	0.014	0.002	3.26e-13	0.00010368	29.1799
FG	13	28487599	rs11619319	A	G	0.78	-0.017	0.002	3.41e-20	0.000103084	29.0124
FG	9	111680359	rs16913693	T	G	0.97	0.039	0.005	2.82e-16	9.94e-05	27.9654
FG	12	97848910	rs6538804	C	G	0.61	0.014	0.002	9.41e-14	9.61e-05	27.0363
FG	3	141134818	rs16851397	A	G	0.95	0.033	0.004	1.26e-12	9.58e-05	26.959
FG	2	27152874	rs1371614	T	C	0.25	0.016	0.002	5.85e-16	9.39e-05	26.4242
FG	6	39034095	rs10305457	T	C	0.09	0.024	0.003	1.21e-14	9.38e-05	26.3976
FG	9	136149399	rs507666	A	G	0.2	0.016	0.002	6.99e-17	8.46e-05	23.82
FG	13	33554302	rs576674	A	G	0.84	-0.018	0.002	9.7e-13	8.41e-05	23.6588
FG	2	27140022	rs877273	T	C	0.38	0.013	0.002	7.22e-15	8.32e-05	23.4195
FG	20	39832628	rs17265513	T	C	0.79	-0.016	0.002	5.1e-14	8.26e-05	23.2463
FG	2	28268742	rs115640879	T	C	0.08	-0.024	0.004	1.3e-11	8.22e-05	23.1241
FG	2	43775309	rs183381538	A	C	0.07	-0.025	0.004	7.81e-15	8.06e-05	22.6857
FG	14	90055468	rs35889227	T	G	0.62	-0.013	0.002	3.37e-10	7.98e-05	22.4479
FG	2	169795288	rs508741	T	C	0.64	-0.013	0.002	1.91e-12	7.81e-05	21.9881
FG	14	90038821	rs8003022	A	G	0.61	-0.013	0.002	5.27e-10	7.8e-05	21.9535
FG	3	187740523	rs6808574	T	C	0.39	-0.013	0.002	7.21e-14	7.68e-05	21.6118
FG	2	169238040	rs78996387	T	C	0.08	-0.023	0.004	1.03e-11	7.51e-05	21.1465
FG	10	26505822	rs2839671	A	G	0.17	-0.016	0.002	8.38e-14	7.28e-05	20.4835
FG	11	46699124	rs8914	A	G	0.11	-0.02	0.003	4.14e-13	7.27e-05	20.4509
FG	11	2182224	rs689	A	T	0.28	0.013	0.002	3.27e-09	7.25e-05	20.4065
FG	11	2181060	rs3842753	T	G	0.28	0.013	0.002	2.84e-09	7.25e-05	20.4021
FG	4	185726548	rs4862423	T	C	0.4	0.012	0.002	4.45e-10	7.24e-05	20.3751
FG	1	150868102	rs78132593	A	C	0.21	-0.015	0.002	2.6e-10	7.13e-05	20.0653
FG	5	76425867	rs7708285	A	G	0.73	-0.013	0.002	1.25e-09	7.05e-05	19.8419
FG	6	153431125	rs12055786	T	C	0.42	0.012	0.002	1.17e-11	7.03e-05	19.7975
FG	1	229672955	rs348330	A	G	0.63	-0.012	0.002	3.04e-10	6.96e-05	19.5802
FG	8	81076874	rs12541643	T	C	0.48	0.012	0.002	4.51e-09	6.95e-05	19.5494
FG	5	76427311	rs6878122	A	G	0.72	-0.013	0.002	2.36e-09	6.87e-05	19.3389
FG	11	8255408	rs2168101	A	C	0.32	-0.013	0.002	3.09e-08	6.8e-05	19.1343
FG	15	77747276	rs11633054	A	G	0.3	-0.013	0.002	3.82e-09	6.75e-05	18.9991
FG	5	55809127	rs157512	T	C	0.76	0.013	0.002	5.43e-10	6.57e-05	18.4977
FG	3	185526108	rs35188816	C	CA	0.29	0.012	0.002	8.67e-11	6.25e-05	17.587
FG	1	100894419	rs6662924	A	C	0.19	0.014	0.002	3.34e-10	6.22e-05	17.4987
FG	11	48333360	rs1483121	A	G	0.14	-0.016	0.003	7.99e-10	6.19e-05	17.4285
FG	7	75836023	rs67070387	T	C	0.03	0.031	0.006	1.6e-08	6.14e-05	17.2882
FG	15	77747190	rs7178572	A	G	0.3	-0.012	0.002	7.09e-10	6.14e-05	17.286
FG	7	75654574	rs58925536	T	C	0.03	0.031	0.005	5.82e-09	6.13e-05	17.261
FG	14	100830818	rs12888855	A	C	0.21	-0.014	0.002	6.02e-12	6.11e-05	17.1959
FG	12	121893626	rs6489811	A	G	0.47	-0.011	0.002	3.27e-09	6.02e-05	16.9501
FG	15	99271135	rs6598541	A	G	0.36	0.011	0.002	4.12e-12	6.01e-05	16.9244
FG	16	4014282	rs2238435	C	G	0.4	0.011	0.002	3.82e-09	6.01e-05	16.9139
FG	2	54941112	rs189548	A	G	0.73	-0.012	0.002	2.81e-09	5.96e-05	16.7763
FG	3	152180329	rs17437560	T	C	0.11	-0.018	0.003	3.33e-08	5.78e-05	16.2807
FG	12	121907336	rs7962128	A	G	0.44	-0.011	0.002	1.78e-08	5.75e-05	16.1845
FG	2	169756930	rs540524	A	G	0.62	-0.011	0.002	1.12e-09	5.7e-05	16.0327
FG	19	46196634	rs2302593	C	G	0.5	0.011	0.002	5.67e-10	5.62e-05	15.8103
FG	1	150940625	rs267738	T	G	0.79	0.013	0.002	3.23e-10	5.52e-05	15.5445
FG	10	95384152	rs7095788	T	C	0.35	-0.011	0.002	1.98e-09	5.14e-05	14.4589
FG	5	102100576	rs7729395	T	C	0.05	-0.023	0.005	3.09e-08	5.05e-05	14.1992
FG	3	185513646	rs7631557	C	G	0.3	0.011	0.002	8.1e-10	4.94e-05	13.9088
FG	8	95960511	rs896854	T	C	0.5	0.01	0.002	5.61e-09	4.9e-05	13.7913
FG	7	89800053	rs13242882	A	T	0.46	-0.01	0.002	9.27e-09	4.68e-05	13.1719
FG	22	30343186	rs39713	T	C	0.09	-0.017	0.003	1.77e-08	4.54e-05	12.7823
FG	15	75102851	rs12594062	T	C	0.36	0.01	0.002	4.64e-09	4.42e-05	12.447
FG	15	75102923	rs11630478	T	G	0.64	-0.01	0.002	4.64e-09	4.42e-05	12.447
FG	7	89854446	rs194520	T	G	0.45	-0.009	0.002	1.14e-08	4.37e-05	12.2921
FG	12	57780936	rs12315434	A	C	0.77	0.011	0.002	4.41e-08	4.27e-05	12.0172
FG	12	56865338	rs2657879	A	G	0.82	-0.012	0.002	7.33e-09	4.18e-05	11.7696
FG	11	49313235	rs10769572	A	G	0.25	0.011	0.002	4.07e-08	4.17e-05	11.7247
FG	11	2856658	rs4930011	C	G	0.59	-0.009	0.002	2.84e-08	4.09e-05	11.5154
HbA1c	1	3691727	rs1175549	A	C	0.75	0.01	0.002	7.13e-13	3.55e-05	10.0045
HbA1c	1	25529038	rs2375278	A	G	0.17	0.011	0.002	1.05e-11	3.59e-05	10.1013
HbA1c	11	61610750	rs174584	A	G	0.35	-0.009	0.001	2.6e-10	3.6e-05	10.1387
HbA1c	1	155284261	rs10796941	T	C	0.25	0.01	0.002	9.22e-09	3.69e-05	10.3764
HbA1c	11	10508903	rs117706710	T	G	0.009	0.046	0.009	4.8e-08	3.75e-05	10.5534
HbA1c	1	155275553	rs7534795	T	C	0.26	0.01	0.002	2.13e-09	3.82e-05	10.7613
HbA1c	6	20676414	rs34499031	T	TAA	0.72	-0.01	0.002	2.93e-12	3.84e-05	10.8041
HbA1c	2	24235704	rs6545222	A	G	0.75	0.01	0.002	1.86e-14	3.88e-05	10.9298
HbA1c	3	12268244	rs12491937	A	G	0.58	0.009	0.001	1.42e-13	3.93e-05	11.0714
HbA1c	1	150940625	rs267738	T	G	0.79	0.011	0.002	1.14e-11	3.94e-05	11.0863
HbA1c	7	15060429	rs10231021	A	T	0.51	0.009	0.001	8.69e-14	3.96e-05	11.1446
HbA1c	9	136154304	rs649129	T	C	0.22	0.011	0.002	3.28e-15	3.97e-05	11.1659
HbA1c	15	65849552	rs368777	A	G	0.57	-0.009	0.001	1.69e-12	4.07e-05	11.4413
HbA1c	6	28449380	rs34979126	A	G	0.07	-0.018	0.003	5.6e-13	4.08e-05	11.473
HbA1c	6	20703952	rs6931514	A	G	0.73	-0.01	0.001	1.18e-13	4.09e-05	11.515
HbA1c	1	25703156	rs644592	T	C	0.15	0.013	0.002	1.58e-11	4.1e-05	11.5437
HbA1c	4	145222284	rs77909720	T	C	0.04	-0.023	0.004	1.63e-09	4.13e-05	11.6198
HbA1c	10	12307894	rs11257655	T	C	0.22	0.011	0.002	1.91e-13	4.16e-05	11.6944
HbA1c	6	24978511	rs12193223	C	G	0.94	0.02	0.003	5.87e-09	4.21e-05	11.8392
HbA1c	12	111833788	rs10774624	A	G	0.52	0.009	0.001	4.17e-14	4.32e-05	12.1443
HbA1c	11	61581656	rs174559	A	G	0.27	-0.011	0.001	3.31e-13	4.47e-05	12.589
HbA1c	11	100456604	rs11224302	T	C	0.1	-0.016	0.002	4.63e-14	4.59e-05	12.9172
HbA1c	6	28984755	rs116735744	T	G	0.24	-0.011	0.002	2.66e-10	4.62e-05	12.9986
HbA1c	15	65822777	rs452306	T	C	0.59	-0.01	0.001	5.51e-13	4.66e-05	13.1078
HbA1c	9	22134253	rs10811662	A	G	0.18	-0.013	0.002	3.17e-14	4.8e-05	13.5038
HbA1c	9	22134094	rs10811661	T	C	0.82	0.013	0.002	1.74e-14	4.81e-05	13.5404
HbA1c	3	170709193	rs1604038	T	C	0.29	-0.011	0.001	2.76e-16	4.83e-05	13.6052
HbA1c	2	169771420	rs13419326	A	C	0.98	-0.032	0.005	5.6e-13	4.88e-05	13.733
HbA1c	2	43449385	rs1367173	T	C	0.12	-0.015	0.002	1.66e-14	4.91e-05	13.8312
HbA1c	17	27183104	rs9914988	A	G	0.8	0.013	0.002	4.66e-17	4.95e-05	13.923
HbA1c	9	110511408	rs7042939	A	G	0.4	0.01	0.001	1.5e-15	4.99e-05	14.033
HbA1c	1	158615702	rs857676	A	G	0.57	0.01	0.001	7.04e-16	5.09e-05	14.3244
HbA1c	3	49382925	rs9818758	A	G	0.18	0.013	0.002	1.49e-13	5.1e-05	14.3433
HbA1c	13	114553134	rs7994900	T	C	0.27	0.011	0.002	6.65e-14	5.11e-05	14.3873
HbA1c	6	27941387	rs13214703	T	C	0.93	0.02	0.003	2.49e-15	5.2e-05	14.6323
HbA1c	19	33037212	rs12978547	C	G	0.97	0.028	0.004	3.96e-12	5.23e-05	14.7165
HbA1c	9	110536932	rs1467311	A	G	0.66	-0.011	0.001	2.26e-15	5.25e-05	14.7844
HbA1c	19	33073431	rs4499344	A	G	0.31	-0.011	0.002	1.35e-12	5.3e-05	14.9201
HbA1c	9	79977312	rs7847351	A	G	0.81	-0.013	0.002	4.95e-14	5.54e-05	15.5804
HbA1c	9	80015424	rs12351997	T	C	0.8	-0.013	0.002	4.5e-14	5.56e-05	15.6507
HbA1c	8	42383084	rs6980507	A	G	0.4	0.011	0.001	8.15e-20	5.7e-05	16.0469
HbA1c	16	293562	rs11248914	T	C	0.66	0.011	0.001	1.42e-14	5.8e-05	16.3271
HbA1c	11	234451	rs4980325	T	G	0.53	0.011	0.001	4.7e-14	5.81e-05	16.3634
HbA1c	6	25578433	rs75580845	T	C	0.92	0.02	0.002	1.23e-20	5.89e-05	16.5633
HbA1c	3	171798694	rs13089972	A	T	0.58	0.011	0.001	1.87e-15	6.01e-05	16.921
HbA1c	3	123068744	rs11719201	T	C	0.24	-0.013	0.002	2.43e-18	6.02e-05	16.9377
HbA1c	3	171812293	rs7632281	T	G	0.43	-0.011	0.001	1.54e-14	6.04e-05	16.9987
HbA1c	19	33072085	rs10405535	A	G	0.3	0.012	0.002	6.47e-14	6.24e-05	17.5696
HbA1c	10	114758349	rs7903146	T	C	0.28	0.013	0.001	1.04e-22	7.1e-05	19.9712
HbA1c	12	4328521	rs117233107	A	G	0.02	-0.047	0.007	8.45e-11	7.68e-05	21.6183
HbA1c	2	24093756	rs12612492	T	C	0.12	0.019	0.002	1.88e-26	7.73e-05	21.7443
HbA1c	6	27037080	rs13194491	T	C	0.07	-0.024	0.003	1.2e-19	7.84e-05	22.0653
HbA1c	19	17257802	rs17533945	T	C	0.6	-0.013	0.001	1.62e-23	7.86e-05	22.1164
HbA1c	12	48512285	rs4760682	A	C	0.8	0.016	0.002	3.2e-20	8.63e-05	24.2771
HbA1c	4	145128105	rs112578089	A	G	0.04	-0.036	0.006	2.18e-11	8.78e-05	24.7063
HbA1c	4	144659795	rs13134327	A	G	0.33	0.014	0.001	2.81e-26	9.16e-05	25.7906
HbA1c	9	91495135	rs61750929	T	C	0.06	-0.028	0.003	9.49e-24	9.18e-05	25.8449
HbA1c	4	144684229	rs13129993	A	T	0.32	0.015	0.002	1.61e-24	9.65e-05	27.1655
HbA1c	8	118191475	rs35859536	T	C	0.32	-0.015	0.001	1.15e-24	9.75e-05	27.444
HbA1c	11	92697981	rs10466351	T	C	0.38	0.015	0.001	5.02e-26	9.91e-05	27.8994
HbA1c	8	118185733	rs11558471	A	G	0.68	0.015	0.001	3.38e-25	9.94e-05	27.9873
HbA1c	2	169786707	rs56100844	T	G	0.98	0.058	0.007	4.47e-17	0.000107879	30.3619
HbA1c	13	113352916	rs76533333	A	G	0.92	-0.027	0.003	2.81e-29	0.000108885	30.6451
HbA1c	8	41543675	rs34664882	A	G	0.03	-0.049	0.004	4.82e-37	0.000132917	37.4097
HbA1c	10	71002040	rs5785903	T	TG	0.43	0.017	0.002	4.39e-29	0.000144627	40.706
HbA1c	6	26091179	rs1799945	C	G	0.86	0.025	0.002	3.32e-47	0.000147465	41.5049
HbA1c	16	88853729	rs837763	T	C	0.56	0.018	0.001	5.2e-38	0.000152796	43.0055
HbA1c	11	92708710	rs10830963	C	G	0.72	-0.02	0.002	1.54e-36	0.000155998	43.9069
HbA1c	6	26093141	rs1800562	A	G	0.06	-0.038	0.003	2.33e-50	0.000162363	45.6986
HbA1c	1	158607935	rs857725	T	G	0.73	-0.021	0.001	5.43e-55	0.0001713	48.2144
HbA1c	22	37462936	rs855791	A	G	0.43	0.019	0.001	1.34e-56	0.000173631	48.8708
HbA1c	8	41630405	rs4737009	A	G	0.24	0.023	0.002	8.29e-56	0.000191036	53.7705
HbA1c	7	44219705	rs10259649	T	C	0.77	-0.024	0.002	4.02e-55	0.000203322	57.2294
HbA1c	6	135419631	rs9389268	A	G	0.73	0.023	0.002	1.62e-51	0.000205255	57.7735
HbA1c	6	135411228	rs9376090	T	C	0.73	0.025	0.001	1.9e-62	0.000238746	67.2024
HbA1c	7	44231216	rs3757840	T	G	0.5	0.022	0.001	4.25e-71	0.000242	68.1187
HbA1c	17	80702963	rs12452572	A	G	0.47	0.023	0.001	9.53e-67	0.000265986	74.8721
HbA1c	7	44234737	rs2908286	T	C	0.17	0.032	0.002	1.62e-87	0.000278964	78.5262
HbA1c	7	44229068	rs1799884	T	C	0.17	0.032	0.002	1.62e-87	0.000279095	78.5632
HbA1c	7	44226101	rs2971670	T	C	0.17	0.032	0.002	5.1e-88	0.00028087	79.063
HbA1c	17	76124865	rs2748424	C	G	0.81	-0.031	0.002	4.13e-39	0.000304422	85.6947
HbA1c	17	80695406	rs62076520	A	G	0.37	-0.026	0.001	3.06e-82	0.000305495	85.9968
HbA1c	17	76121864	rs2748427	A	G	0.78	-0.031	0.002	9.82e-49	0.000322405	90.7586
HbA1c	2	169777595	rs557462	T	C	0.65	0.027	0.001	3.94e-102	0.000333892	93.9932
HbA1c	17	76125194	rs200350733	A	AGC	0.2	0.033	0.003	1.48e-40	0.000342499	96.4169
HbA1c	17	80682778	rs72634341	A	G	0.72	-0.031	0.002	5.59e-97	0.000381499	107.4
HbA1c	2	169763148	rs560887	T	C	0.3	-0.031	0.001	5.55e-122	0.000396598	111.652
HbA1c	17	80778724	rs191734192	A	G	0.13	0.042	0.003	3.75e-66	0.000401135	112.93
HbA1c	17	80689036	rs9909940	T	C	0.31	0.032	0.001	1.43e-116	0.000441177	124.208
HbA1c	17	80697458	rs113373052	T	C	0.3	0.033	0.001	7.09e-113	0.000453075	127.559
HbA1c	10	71093216	rs150705486	A	G	0.02	-0.114	0.006	4.24e-72	0.000503567	141.782
HbA1c	X	153542572	rs140801471	A	G	0.05	-0.082	0.007	6.42e-31	0.000618074	174.042
HbA1c	X	150104927	rs184506746	T	C	0.013	-0.171	0.028	2.46e-08	0.000721043	203.058
HbA1c	10	71118821	rs200572185	A	AAG	0.04	-0.094	0.004	1.53e-140	0.000728897	205.271
HbA1c	10	71089843	rs4745982	T	G	0.92	0.074	0.003	8.36e-143	0.000766514	215.873
HbA1c	X	152051223	rs182859029	T	C	0.99	0.246	0.038	8.03e-10	0.000769022	216.58
HbA1c	10	71099109	rs72805692	A	G	0.89	0.079	0.002	8.52e-294	0.00118052	332.608
HbA1c	10	71094504	rs17476364	T	C	0.9	0.086	0.002	1.33E-314	0.00131212	369.734
HbA1c	X	154212603	rs149309160	T	G	0.95	0.125	0.008	2.36e-47	0.00152819	430.713
HbA1c	X	153018275	rs138245006	T	C	0.97	0.251	0.015	1.98e-58	0.00395649	1117.83
T2DM	10	114758349	rs7903146	C	T	0.708	-0.28	0.005	2.78e-695	0.0324227	34934.6
T2DM	16	53800954	rs1421085	C	T	0.414	0.118	0.005	5.63e-144	0.00672268	7056.08
T2DM	6	20679709	rs7756992	G	A	0.271	0.122	0.005	5.52e-128	0.00584662	6131.17
T2DM	9	22134094	rs10811661	C	T	0.172	-0.138	0.006	8.14e-112	0.00540899	5669.75
T2DM	3	185520948	rs9854769	G	A	0.319	0.108	0.005	1.06e-107	0.00502094	5260.93
T2DM	8	118185733	rs11558471	G	A	0.316	-0.103	0.005	3.98e-98	0.0045974	4815.1
T2DM	10	94462882	rs1111875	C	T	0.592	0.092	0.005	5.21e-89	0.00411417	4306.9
T2DM	2	227101309	rs2972145	C	T	0.635	0.09	0.005	7.45e-80	0.003753	3927.39
T2DM	12	4328521	rs117233107	G	A	0.983	0.325	0.021	4.42e-55	0.00347109	3621.91
T2DM	4	6306763	rs10937721	G	C	0.412	-0.084	0.005	6.31e-70	0.00337814	3533.78
T2DM	7	28200097	rs1513272	C	T	0.509	0.081	0.005	3.97e-71	0.00328761	3438.76
T2DM	11	92708710	rs10830963	G	C	0.278	0.089	0.005	4.57e-68	0.00314481	3288.93
T2DM	8	41508577	rs13262861	C	A	0.824	0.102	0.006	2.84e-59	0.00299671	3133.58
T2DM	2	43671176	rs13414140	C	T	0.886	0.118	0.007	4.31e-60	0.0028314	2960.22
T2DM	10	12307894	rs11257655	C	T	0.781	-0.091	0.007	7.25e-35	0.00281503	2386.17
T2DM	11	2857194	rs2237895	C	A	0.423	0.073	0.005	2.73e-54	0.00256596	2681.99
T2DM	13	80705315	rs11616380	G	T	0.721	0.079	0.005	7.99e-54	0.00253219	2646.61
T2DM	11	72460762	rs11602873	T	A	0.156	-0.098	0.006	8.91e-52	0.00251233	2625.8
T2DM	3	12329783	rs17036160	C	T	0.88	0.103	0.007	3.04e-47	0.00223835	2338.8
T2DM	1	214159256	rs340874	C	T	0.553	0.067	0.005	5.37e-48	0.00220624	2305.17
T2DM	11	17409572	rs5219	C	T	0.627	-0.069	0.005	3.15e-48	0.00219428	2292.66
T2DM	7	15064309	rs2191349	G	T	0.461	-0.066	0.005	6.41e-48	0.00217131	2268.6
T2DM	15	77782335	rs12910361	G	A	0.698	0.072	0.005	2.97e-44	0.0021605	2257.28
T2DM	3	123065778	rs11708067	G	A	0.229	-0.078	0.006	1.5e-46	0.00215675	2253.35
T2DM	9	139243334	rs28429551	T	A	0.26	-0.073	0.006	9.51e-40	0.00207468	2161.8
T2DM	2	165528876	rs13389219	C	T	0.603	0.065	0.005	7.35e-44	0.00200991	2099.62
T2DM	2	27730940	rs1260326	C	T	0.595	0.064	0.005	2.55e-42	0.00196237	2035.82
T2DM	16	75234872	rs72802342	C	A	0.921	0.115	0.009	5.58e-38	0.00194685	2033.63
T2DM	1	39820310	rs61779275	C	T	0.78	-0.075	0.006	3.35e-43	0.00194343	2030.05
T2DM	6	32654714	rs9275184	C	T	0.111	0.098	0.01	5.59e-24	0.0018933	1598.24
T2DM	5	55810305	rs256904	T	A	0.73	0.069	0.005	2.55e-39	0.001889	1973.08
T2DM	10	80942855	rs703981	G	C	0.544	0.061	0.005	2.13e-40	0.00186436	1947.3
T2DM	5	14751305	rs146886108	C	T	0.994	0.39	0.033	1.93e-31	0.00181425	1859.86
T2DM	11	2197286	rs4929965	G	A	0.615	-0.062	0.005	2.46e-38	0.00181411	1889.79
T2DM	4	85384069	rs987949	G	A	0.961	-0.153	0.026	6.23e-09	0.00177626	1840.06
T2DM	9	84308948	rs2796441	G	A	0.591	0.059	0.005	9.96e-37	0.00167765	1751.96
T2DM	17	36100767	rs11657964	G	A	0.596	-0.059	0.005	1.23e-36	0.00167106	1745.06
T2DM	5	102586407	rs75432112	G	A	0.952	-0.134	0.011	5.34e-36	0.00166064	1729.65
T2DM	12	27962260	rs10771372	C	T	0.805	0.072	0.006	2.2e-35	0.00163268	1704.91
T2DM	2	60586707	rs243018	G	C	0.463	0.056	0.005	1.52e-33	0.00155941	1628.29
T2DM	3	187741842	rs6777684	G	A	0.608	0.057	0.005	3.77e-33	0.00154384	1612
T2DM	12	66170481	rs2583921	C	A	0.092	0.095	0.008	8.98e-33	0.00152352	1590.75
T2DM	6	126792095	rs11759026	G	A	0.231	0.065	0.007	6.68e-19	0.00148128	1253.94
T2DM	19	46157237	rs10407429	G	A	0.579	0.054	0.005	4.79e-31	0.0014168	1479.16
T2DM	12	121432117	rs56348580	G	C	0.696	0.058	0.005	2.33e-30	0.00139962	1461.2
T2DM	3	170733076	rs9873618	G	A	0.709	0.058	0.005	2.41e-30	0.00139178	1453
T2DM	17	47060322	rs35895680	C	A	0.686	0.056	0.005	1.42e-28	0.00134666	1405.84
T2DM	15	90380214	rs8031576	C	A	0.289	0.057	0.005	1.74e-29	0.0013352	1393.86
T2DM	7	44234737	rs2908286	C	T	0.829	-0.068	0.006	2.64e-29	0.00132442	1382.59
T2DM	19	45411941	rs429358	C	T	0.145	-0.073	0.007	3.98e-28	0.00132435	1378.92
T2DM	5	76427311	rs6878122	G	A	0.311	0.055	0.005	4.6e-29	0.00131624	1370.47
T2DM	17	3988451	rs8071043	C	T	0.328	0.054	0.005	5.16e-28	0.00129104	1347.69
T2DM	1	229672955	rs348330	G	A	0.369	0.053	0.007	6.5e-16	0.00128396	1086.68
T2DM	3	23455582	rs35352848	C	T	0.207	-0.062	0.006	7.37e-28	0.00127378	1329.66
T2DM	6	7231843	rs9379084	G	A	0.88	0.075	0.008	3.7e-22	0.00117597	1224.25
T2DM	2	65284231	rs2540949	T	A	0.384	-0.05	0.005	9.19e-26	0.0011641	1215.03
T2DM	7	156930550	rs6459733	G	C	0.666	0.051	0.005	9.66e-25	0.00114895	1199.2
T2DM	15	41801512	rs2289739	G	T	0.65	-0.05	0.007	1.57e-14	0.00112857	955.019
T2DM	13	33554302	rs576674	G	A	0.185	0.061	0.006	1.25e-23	0.00112849	1177.83
T2DM	6	31264461	rs3094682	C	A	0.806	0.06	0.006	2.37e-23	0.00112008	1165.99
T2DM	3	3649850	rs9842137	C	T	0.997	-0.425	0.074	9.26e-09	0.00111851	1145.82
T2DM	19	19379549	rs58542926	C	T	0.925	-0.089	0.009	4.67e-25	0.00110577	1154.08
T2DM	8	145551199	rs3757969	G	C	0.376	0.048	0.005	3.6e-22	0.00108531	1124.95
T2DM	9	136145240	rs495203	C	T	0.665	-0.049	0.005	1.03e-24	0.00108274	1130.03
T2DM	10	124193181	rs2280141	G	T	0.48	-0.045	0.006	1.09e-13	0.00102442	866.797
T2DM	9	4291928	rs10974438	C	A	0.356	0.047	0.005	8.99e-23	0.00101238	1056.51
T2DM	14	79939525	rs10145154	C	T	0.784	-0.055	0.006	1.06e-22	0.00101036	1054.4
T2DM	15	91512067	rs2290203	G	A	0.798	-0.056	0.006	1.79e-22	0.00100133	1044.97
T2DM	6	137302159	rs1573090	G	T	0.465	-0.045	0.005	3.88e-22	0.000989651	1032.77
T2DM	13	26776999	rs34584161	G	A	0.239	-0.052	0.005	3.54e-22	0.000988521	1031.59
T2DM	5	74955841	rs253412	G	A	0.348	-0.046	0.005	2.77e-21	0.00095554	997.14
T2DM	1	120526982	rs1493694	C	T	0.893	-0.071	0.007	6.51e-22	0.000951387	992.802
T2DM	11	128234144	rs10750397	G	A	0.71	-0.048	0.005	1.01e-20	0.0009484	989.682
T2DM	2	121325908	rs9784137	G	A	0.849	0.061	0.007	5.25e-21	0.000947811	989.067
T2DM	19	13038415	rs3111316	G	A	0.412	-0.044	0.005	3.43e-21	0.000946286	984.907
T2DM	5	53272664	rs4865796	G	A	0.318	-0.047	0.005	4.64e-21	0.00094255	983.571
T2DM	3	64708114	rs4132228	C	T	0.703	0.047	0.005	6.22e-21	0.000927088	967.421
T2DM	13	51094114	rs9316500	G	T	0.292	-0.047	0.005	9.97e-21	0.000925801	966.077
T2DM	1	219741820	rs2820444	G	A	0.713	0.047	0.005	8.66e-21	0.00091177	951.423
T2DM	4	185713608	rs72695645	G	A	0.86	0.061	0.007	8.66e-20	0.000899494	938.601
T2DM	1	117532790	rs1127215	C	T	0.585	0.043	0.005	1.93e-20	0.000897593	936.616
T2DM	8	97737741	rs149364428	G	A	0.991	-0.224	0.031	5.65e-13	0.000894241	915.876
T2DM	3	186665645	rs3887925	C	T	0.455	-0.042	0.005	6.53e-20	0.000891534	930.288
T2DM	11	69453044	rs144245804	G	A	0.973	0.13	0.015	1.13e-17	0.000890215	927.734
T2DM	10	93956552	rs7071943	G	T	0.653	0.044	0.005	2.22e-19	0.000889125	927.771
T2DM	4	45186139	rs10938398	G	A	0.569	-0.043	0.005	3.91e-20	0.000886075	924.586
T2DM	8	128711742	rs17772814	G	A	0.915	0.075	0.013	3.44e-09	0.000875885	738.628
T2DM	18	57846077	rs663640	C	T	0.782	-0.05	0.006	1.15e-19	0.000862068	899.514
T2DM	16	300388	rs55857387	C	T	0.195	-0.052	0.006	6.71e-19	0.000861026	898.426
T2DM	16	69568303	rs2032912	G	T	0.584	0.042	0.005	2.12e-19	0.000861014	898.413
T2DM	20	42994812	rs12625671	C	T	0.114	0.065	0.007	6.74e-19	0.000858086	895.356
T2DM	16	81534790	rs2925979	C	T	0.692	-0.045	0.005	1.54e-19	0.000856161	893.345
T2DM	4	744972	rs1531583	G	T	0.955	-0.099	0.011	7.06e-19	0.00084382	878.169
T2DM	17	65828371	rs2080090	T	A	0.812	-0.053	0.006	7.84e-19	0.000842891	879.487
T2DM	9	28410683	rs1412234	C	T	0.319	0.044	0.005	4e-19	0.00084143	877.961
T2DM	2	16574669	rs11680058	G	A	0.162	-0.056	0.01	1.23e-08	0.000839341	708.895
T2DM	4	1784403	rs56337234	C	T	0.505	0.041	0.005	1.88e-18	0.000836328	870.365
T2DM	7	130457931	rs1562398	G	C	0.417	0.041	0.005	1.99e-18	0.000817283	852.746
T2DM	3	63897215	rs2292662	C	T	0.844	0.056	0.007	7.64e-18	0.000815742	851.136
T2DM	20	45594711	rs6066138	G	A	0.725	0.045	0.005	1.58e-18	0.000810695	845.866
T2DM	18	53050646	rs72926932	C	A	0.078	0.075	0.008	7.58e-20	0.000809739	844.868
T2DM	18	60845884	rs12454712	C	T	0.383	-0.041	0.005	8.3e-18	0.000802327	834.952
T2DM	15	62391608	rs7163757	C	T	0.574	0.041	0.005	1.64e-18	0.000802112	836.904
T2DM	5	137823156	rs112667817	C	T	0.879	0.061	0.011	5.76e-09	0.000789493	171.087
T2DM	12	26465585	rs11048458	C	T	0.75	-0.046	0.005	4.66e-18	0.000785985	820.064
T2DM	5	158026744	rs890940	C	T	0.789	-0.048	0.006	9.78e-18	0.000780786	814.635
T2DM	12	71523043	rs1705263	C	A	0.569	0.04	0.005	1.22e-17	0.000777024	810.707
T2DM	7	30728452	rs917195	C	T	0.769	0.047	0.006	2.71e-17	0.000774588	808.163
T2DM	6	164133001	rs4709746	C	T	0.869	0.058	0.007	1.03e-16	0.000770046	803.421
T2DM	6	127401978	rs12194820	T	A	0.235	-0.046	0.006	9.19e-17	0.000766532	799.752
T2DM	22	44324855	rs3747207	G	A	0.779	-0.047	0.006	9.26e-18	0.000763591	796.681
T2DM	11	65294799	rs1783541	C	T	0.797	-0.048	0.006	3.89e-17	0.000757453	790.273
T2DM	12	124458002	rs12823740	C	A	0.661	0.041	0.005	1.48e-17	0.00075292	785.539
T2DM	15	38852386	rs12912777	C	T	0.879	-0.059	0.008	1.75e-15	0.000750011	780.467
T2DM	8	9996389	rs34990153	G	A	0.439	-0.038	0.005	1.99e-16	0.000726306	757.752
T2DM	9	81344701	rs1929883	G	A	0.58	0.039	0.006	4.84e-10	0.000725909	614.033
T2DM	6	40409243	rs34298980	C	T	0.5	-0.038	0.007	4.2e-09	0.000725804	608.759
T2DM	4	103932556	rs7695096	C	T	0.521	0.038	0.005	1.27e-16	0.000724549	755.918
T2DM	6	50788778	rs3798519	C	A	0.18	0.05	0.006	5.49e-17	0.000724254	755.61
T2DM	14	101255172	rs73347525	G	A	0.19	-0.049	0.008	7.36e-09	0.000723147	609.732
T2DM	2	653874	rs10188334	C	T	0.828	0.05	0.006	7.76e-16	0.000721646	752.887
T2DM	1	235542023	rs10737818	G	A	0.639	0.04	0.006	7.26e-10	0.000720267	609.257
T2DM	1	6669970	rs12741141	G	C	0.362	0.04	0.005	1.37e-16	0.000720267	751.447
T2DM	1	51438365	rs3176466	C	T	0.903	0.064	0.008	9.36e-16	0.000720043	751.213
T2DM	13	91963080	rs1475655	T	A	0.253	-0.044	0.005	2.47e-16	0.000717965	749.043
T2DM	17	40696915	rs684214	C	T	0.727	-0.042	0.005	2.57e-16	0.000713933	744.834
T2DM	4	153504295	rs6819331	C	T	0.68	0.04	0.005	2.21e-16	0.000710786	741.548
T2DM	11	43876698	-	C	T	0.695	-0.041	0.005	8.66e-17	0.00070214	732.522
T2DM	3	124921457	rs9873519	C	T	0.466	-0.038	0.005	3.58e-16	0.000699874	730.156
T2DM	8	95961626	rs10097617	C	T	0.52	-0.037	0.005	1.93e-16	0.000698305	728.519
T2DM	8	116639474	rs2737226	C	T	0.611	-0.038	0.005	2.52e-16	0.000697037	727.194
T2DM	19	7968168	rs2115107	G	A	0.608	-0.038	0.005	8.45e-16	0.000695831	724.048
T2DM	12	123493123	rs12820906	G	A	0.244	-0.043	0.006	2.21e-15	0.000690931	720.82
T2DM	22	30588041	rs5753043	C	A	0.898	0.061	0.008	3.76e-14	0.000688977	718.78
T2DM	19	33890838	rs10406327	G	C	0.475	-0.037	0.005	8.75e-16	0.000682843	712.376
T2DM	20	32596704	rs2268078	G	A	0.345	-0.039	0.005	2.14e-15	0.000676602	705.861
T2DM	6	43760327	rs11967262	G	C	0.488	0.037	0.005	2.23e-15	0.000665722	694.503
T2DM	12	133070294	rs11614914	C	T	0.675	-0.039	0.005	4.65e-15	0.000664344	691.263
T2DM	10	71321279	rs177045	G	A	0.324	0.039	0.005	2.3e-15	0.000662645	691.291
T2DM	9	20241069	rs7867635	C	T	0.411	0.037	0.006	4.21e-09	0.000662617	560.46
T2DM	9	19080352	rs10963942	G	A	0.397	0.037	0.005	4.49e-15	0.000658716	687.189
T2DM	16	29958216	rs8054556	G	A	0.538	-0.036	0.005	3.68e-15	0.000658593	687.061
T2DM	5	78436905	rs12519500	C	A	0.654	0.038	0.005	1.76e-15	0.000653775	682.031
T2DM	8	11069960	rs2409742	C	T	0.507	0.036	0.005	7.34e-15	0.000651462	679.617
T2DM	3	141134569	rs73872717	C	T	0.953	0.086	0.011	4.78e-15	0.000651086	679.224
T2DM	4	157652753	rs28819812	C	A	0.675	0.038	0.005	3.36e-14	0.000647273	675.243
T2DM	12	118412373	rs34965774	G	A	0.862	-0.052	0.007	1.38e-14	0.000644611	672.465
T2DM	18	7070642	rs7240767	C	T	0.379	0.037	0.006	5.03e-09	0.000637596	539.283
T2DM	1	201763499	rs567185	C	T	0.366	-0.037	0.005	1.55e-14	0.000635043	662.477
T2DM	3	128579324	rs181752889	C	T	0.996	-0.282	0.047	1.87e-09	0.000634546	649.73
T2DM	11	14518419	rs117316450	G	C	0.019	0.131	0.018	2.07e-13	0.000631191	657.623
T2DM	2	59311536	rs980183	G	A	0.394	0.036	0.005	1.02e-14	0.000629346	656.53
T2DM	15	75814388	rs6495182	C	T	0.748	0.041	0.005	2.9e-14	0.000620764	647.572
T2DM	1	151017991	rs145904381	C	T	0.01	-0.174	0.023	4.31e-14	0.000619615	642.808
T2DM	5	86577352	rs7719891	G	A	0.261	0.04	0.007	8.96e-09	0.000619533	523.996
T2DM	20	50999627	rs2426439	C	T	0.632	0.037	0.005	2.08e-14	0.000619487	646.24
T2DM	2	161145612	rs6432613	G	A	0.724	0.039	0.005	6.73e-14	0.000617805	644.484
T2DM	19	7235146	rs17175860	G	A	0.192	0.045	0.006	2.55e-14	0.000614172	640.691
T2DM	7	102800137	rs1968204	C	T	0.893	-0.057	0.008	1.08e-12	0.000612207	638.64
T2DM	2	111888043	rs72836348	G	A	0.892	0.056	0.008	3.2e-13	0.000610028	636.366
T2DM	11	32956492	rs62618693	C	T	0.957	0.085	0.011	6.83e-14	0.000604155	628.597
T2DM	12	108618630	rs3764002	C	T	0.741	0.04	0.005	2.69e-14	0.000601617	627.586
T2DM	10	13566204	rs878017	G	A	0.459	-0.035	0.006	1.13e-08	0.000601468	508.708
T2DM	20	57387262	rs911300	G	A	0.542	0.035	0.005	5.19e-14	0.000601207	627.158
T2DM	17	61563200	rs4325	C	A	0.539	0.035	0.005	6.92e-14	0.000594975	620.654
T2DM	12	97848227	rs113036477	C	T	0.938	0.072	0.01	4.09e-13	0.00059372	619.344
T2DM	8	30854033	rs2725371	G	A	0.69	-0.037	0.005	2.14e-13	0.000589351	614.783
T2DM	15	63940058	rs34143602	G	A	0.422	0.035	0.005	1e-13	0.000587431	612.779
T2DM	14	33302882	rs17522122	G	T	0.524	-0.034	0.005	1.27e-13	0.000586912	612.238
T2DM	4	18025484	rs2011603	G	A	0.275	-0.038	0.005	1.59e-13	0.000585186	610.436
T2DM	15	52588722	rs74804697	G	C	0.043	-0.084	0.012	4.68e-12	0.000581703	606.032
T2DM	17	37746307	rs11078916	C	T	0.704	-0.037	0.005	4.84e-13	0.000579959	604.98
T2DM	8	110140564	rs4734193	C	A	0.532	0.034	0.006	3.7e-08	0.000579053	489.739
T2DM	9	81905590	rs17791513	G	A	0.066	-0.069	0.01	2.17e-12	0.000576919	601.807
T2DM	1	118148384	rs41276588	G	A	0.717	-0.038	0.005	4.1e-13	0.000570687	595.303
T2DM	20	62470785	rs4809369	G	A	0.555	0.034	0.005	4.27e-13	0.000561024	583.696
T2DM	12	48736303	rs2732480	C	A	0.565	0.034	0.005	3.05e-13	0.000558307	582.382
T2DM	9	96943059	rs10821311	G	A	0.681	-0.036	0.005	4e-13	0.000556844	580.855
T2DM	2	25635771	rs34845373	G	A	0.271	-0.037	0.005	1.18e-12	0.000546907	566.576
T2DM	15	53099306	rs75332279	C	T	0.096	0.056	0.008	4.93e-12	0.000544386	567.852
T2DM	20	61277014	rs1815591	T	A	0.602	-0.034	0.005	5.5e-12	0.00054426	567.721
T2DM	19	4949921	rs12977104	G	A	0.801	-0.041	0.006	1.46e-12	0.000542161	565.531
T2DM	13	23309382	rs314879	C	T	0.226	0.039	0.006	5.74e-12	0.000540675	563.979
T2DM	9	34074476	rs12001437	C	T	0.373	0.034	0.005	6.27e-13	0.000537358	560.518
T2DM	3	135625498	rs9852406	C	T	0.746	-0.038	0.005	8.96e-13	0.00053237	555.311
T2DM	18	21083738	rs303760	C	T	0.652	-0.034	0.005	1.48e-12	0.000530631	553.497
T2DM	12	133777466	rs12305809	G	A	0.607	0.033	0.005	1.45e-12	0.00052929	552.098
T2DM	22	50435480	rs5771069	G	A	0.505	0.033	0.005	1.78e-12	0.000528072	550.826
T2DM	6	153428102	rs9383649	G	A	0.419	0.033	0.005	1.06e-12	0.000527072	549.782
T2DM	6	107427166	rs60519666	G	A	0.677	0.035	0.005	3.19e-12	0.000526684	549.378
T2DM	6	160776017	rs543159	C	A	0.52	0.032	0.005	1.29e-12	0.000524015	546.592
T2DM	19	47580185	rs11667244	G	A	0.702	0.035	0.005	2.17e-12	0.000523907	545.787
T2DM	4	1267203	rs72501964	G	T	0.961	0.083	0.013	2.09e-10	0.000522722	544.552
T2DM	14	38818723	rs8018512	G	A	0.742	0.037	0.005	1.3e-12	0.000521718	544.194
T2DM	17	17715317	rs2297508	G	C	0.632	-0.033	0.005	1.86e-12	0.000518905	541.259
T2DM	4	106048291	rs17035289	C	T	0.171	0.043	0.006	5.71e-12	0.000518877	541.23
T2DM	7	23440057	rs75693095	G	C	0.979	-0.112	0.017	1.42e-11	0.000518187	539.105
T2DM	12	50263148	rs7132908	G	A	0.61	-0.033	0.005	1.41e-12	0.00051805	540.367
T2DM	1	205114873	rs12048743	G	C	0.44	0.032	0.005	2.11e-12	0.000517297	539.58
T2DM	4	83587562	rs10471048	G	C	0.349	0.034	0.005	2.31e-12	0.000515849	538.07
T2DM	2	158335340	rs7568172	G	A	0.94	0.067	0.01	2.64e-12	0.00051562	537.831
T2DM	4	53207093	rs114447556	C	T	0.917	-0.058	0.009	7.79e-11	0.000510777	532.777
T2DM	14	91963722	rs8010382	G	A	0.437	0.032	0.005	5.74e-12	0.000510268	532.245
T2DM	3	138055136	rs6766859	C	T	0.376	0.033	0.005	7.24e-12	0.00050808	529.962
T2DM	3	49980596	rs4688760	C	T	0.326	-0.034	0.005	1.1e-11	0.000508002	529.88
T2DM	3	115084080	rs6438247	C	T	0.155	0.044	0.007	4.05e-11	0.000506066	527.86
T2DM	3	47693664	rs62262091	C	T	0.911	-0.056	0.009	1.14e-10	0.000505133	525.517
T2DM	7	150537635	rs62492368	G	A	0.685	-0.034	0.005	6.38e-12	0.000504931	526.676
T2DM	11	8654528	rs10769936	C	T	0.707	0.035	0.005	6.29e-12	0.00050422	525.934
T2DM	8	129568078	rs1561927	C	T	0.282	0.035	0.005	8.61e-12	0.00050186	523.471
T2DM	1	28110797	rs111824905	C	T	0.055	0.069	0.012	4.02e-09	0.000498364	518.471
T2DM	3	152451616	rs74672008	G	A	0.96	0.08	0.012	1.38e-11	0.000495258	515.927
T2DM	3	150066540	rs62271373	T	A	0.944	-0.069	0.01	4.45e-11	0.000494435	515.722
T2DM	3	160171092	rs56394279	C	T	0.468	0.031	0.005	5.3e-12	0.000490961	512.097
T2DM	20	42310811	rs419842	T	A	0.821	0.041	0.006	7.17e-11	0.000489695	510.776
T2DM	1	72839774	rs2613503	C	A	0.199	-0.039	0.006	7.48e-11	0.000489508	510.58
T2DM	3	168225055	rs1449348	C	T	0.859	0.045	0.007	6.64e-12	0.000487621	508.612
T2DM	3	129333182	rs9828772	G	C	0.101	-0.052	0.008	2.7e-11	0.000486671	507.62
T2DM	20	48833957	rs867489	C	T	0.539	0.031	0.005	1.51e-11	0.000483698	504.517
T2DM	13	58656599	rs9563574	C	T	0.177	-0.041	0.006	1.64e-11	0.000480236	500.905
T2DM	3	9514016	rs3872707	G	A	0.86	-0.045	0.007	3.46e-11	0.000479276	499.903
T2DM	5	44680687	rs13155752	C	A	0.397	0.032	0.005	1.12e-11	0.000477886	498.453
T2DM	15	40398754	rs484943	C	T	0.682	-0.033	0.005	7.61e-11	0.000477777	498.339
T2DM	10	99059645	rs10882891	C	A	0.415	0.031	0.005	1.68e-11	0.000475788	496.263
T2DM	10	112647195	rs10787287	C	T	0.241	-0.036	0.006	6.56e-11	0.00047426	494.669
T2DM	8	12643055	rs12056338	G	T	0.586	-0.031	0.005	2.88e-11	0.000472388	492.715
T2DM	6	39016636	rs10305420	C	T	0.616	0.032	0.005	2.69e-11	0.00047236	492.686
T2DM	3	149196752	rs34573045	G	C	0.42	0.031	0.005	2.27e-11	0.000471287	491.566
T2DM	2	181618654	rs6741676	G	A	0.332	-0.032	0.005	3.64e-11	0.000465694	485.73
T2DM	9	125975397	rs7026688	G	A	0.863	0.044	0.007	3.4e-11	0.000465579	485.61
T2DM	2	152167830	rs13020443	C	T	0.498	0.031	0.005	2.65e-11	0.00046512	485.131
T2DM	10	70342775	rs10998304	C	T	0.452	0.031	0.005	1.77e-11	0.000463811	483.765
T2DM	3	184877626	rs10937208	G	A	0.136	0.044	0.007	1.06e-10	0.000461201	481.041
T2DM	12	43046449	rs11181613	C	A	0.855	0.043	0.007	1.37e-10	0.000459247	479.002
T2DM	12	95928113	rs11108094	C	A	0.932	-0.06	0.009	1.16e-10	0.000459078	478.826
T2DM	4	96114385	rs3755879	G	A	0.685	-0.033	0.005	5.78e-11	0.00045887	478.609
T2DM	17	62201374	rs11655898	C	T	0.07	0.059	0.01	5.85e-10	0.000456356	475.986
T2DM	19	1224286	rs35004890	G	T	0.779	-0.036	0.006	8.57e-10	0.000453704	471.989
T2DM	11	9852475	rs2403221	G	A	0.343	-0.032	0.005	5.6e-11	0.00045278	472.254
T2DM	12	41838235	rs2733289	C	T	0.478	0.03	0.005	3.98e-11	0.000452088	471.532
T2DM	6	118011723	rs72951506	C	T	0.852	0.042	0.007	9.22e-11	0.000450993	470.389
T2DM	6	139837128	rs11155073	C	T	0.579	-0.03	0.005	4.43e-11	0.000450545	469.922
T2DM	1	206618799	rs2336938	C	A	0.516	-0.03	0.005	9.54e-11	0.000446536	465.738
T2DM	3	15741389	rs4465929	C	T	0.596	-0.03	0.005	5.11e-11	0.000445188	464.332
T2DM	14	74948180	rs8008540	C	T	0.569	0.03	0.005	7.99e-11	0.000444428	463.539
T2DM	2	145261174	rs2033159	C	A	0.234	0.035	0.006	4.9e-10	0.000444313	463.419
T2DM	4	48880627	rs62310934	G	C	0.389	-0.03	0.005	1.37e-10	0.000439225	458.11
T2DM	7	100312724	rs534043	G	A	0.874	0.045	0.007	8.03e-10	0.000438879	457.749
T2DM	9	136885979	rs448918	G	A	0.713	-0.033	0.005	1.11e-09	0.000437984	456.815
T2DM	18	74582340	rs2658746	C	T	0.39	0.03	0.005	9.89e-11	0.000436706	455.481
T2DM	1	155269776	rs3020781	G	A	0.27	0.033	0.005	1.05e-10	0.000436614	455.385
T2DM	12	33410780	rs10844518	G	A	0.287	0.033	0.005	8.8e-11	0.000435128	453.835
T2DM	10	72648336	rs827237	C	T	0.795	-0.037	0.006	3.56e-10	0.000434247	452.916
T2DM	17	76762039	rs62075585	G	A	0.474	0.03	0.005	1.25e-10	0.000433903	452.556
T2DM	11	45846498	rs11038672	G	C	0.524	-0.029	0.005	1.04e-10	0.000431201	449.737
T2DM	7	117495667	rs6976111	C	A	0.693	-0.032	0.005	7.93e-10	0.00043005	448.537
T2DM	16	3634746	rs12933120	C	A	0.861	-0.042	0.007	3.18e-10	0.000429269	447.722
T2DM	9	85318704	rs555784	T	A	0.616	0.03	0.005	1.7e-10	0.000428706	447.134
T2DM	5	51763665	rs12187734	C	T	0.523	0.029	0.005	2.24e-10	0.000428305	446.715
T2DM	18	56878274	rs1517037	C	T	0.813	0.038	0.006	3.22e-10	0.000427235	445.599
T2DM	7	1872921	rs4721089	C	T	0.243	-0.034	0.006	7.92e-10	0.000425532	443.822
T2DM	10	101912064	rs2862954	C	T	0.484	-0.029	0.005	1.56e-10	0.000422944	441.122
T2DM	17	46124326	rs9900074	G	C	0.925	0.055	0.009	3.24e-10	0.000422288	440.438
T2DM	11	55588216	rs116861182	C	A	0.055	0.064	0.011	5.9e-09	0.000421075	438.03
T2DM	2	146348037	rs7609422	G	A	0.41	0.03	0.005	2.67e-10	0.00042087	438.958
T2DM	6	143069315	rs197482	C	T	0.616	0.03	0.005	2.64e-10	0.000420039	438.09
T2DM	15	74331659	rs12917449	C	A	0.197	0.036	0.006	4.71e-10	0.000419193	437.208
T2DM	7	15926228	rs38221	C	T	0.74	-0.033	0.005	6.62e-10	0.000418943	436.947
T2DM	10	73835274	rs12773019	G	C	0.028	0.089	0.016	4.82e-08	0.000418927	435.795
T2DM	13	109944192	rs9555581	C	T	0.61	0.03	0.005	3.72e-10	0.0004168	434.711
T2DM	14	35390146	rs799661	C	T	0.871	0.043	0.007	7.11e-09	0.000416601	434.503
T2DM	4	95091911	rs6821438	G	A	0.469	-0.029	0.005	3.66e-10	0.00041601	433.887
T2DM	3	89986280	rs11716527	C	T	0.095	0.049	0.009	6.69e-09	0.000414267	430.945
T2DM	7	12269593	rs13237518	C	A	0.586	-0.029	0.005	7.73e-10	0.000413766	431.546
T2DM	2	26192802	rs72803684	C	T	0.954	-0.069	0.012	6.01e-09	0.000413533	427.227
T2DM	19	12496934	rs11666603	C	T	0.744	0.033	0.006	1.71e-09	0.00041232	430.037
T2DM	2	203450680	rs12463719	G	A	0.718	-0.032	0.005	6.15e-10	0.000411817	429.512
T2DM	16	89564055	rs12920022	T	A	0.84	-0.039	0.007	2.26e-09	0.000411568	429.252
T2DM	9	111936128	rs7858727	C	A	0.223	0.034	0.006	8.33e-10	0.000410477	428.114
T2DM	4	76535086	rs2055997	G	A	0.701	0.031	0.005	6.53e-10	0.000410369	428.001
T2DM	2	234324192	rs838735	G	C	0.616	-0.029	0.005	3.64e-10	0.000409039	426.613
T2DM	3	195810187	rs7619708	C	T	0.242	-0.033	0.005	3.46e-10	0.000409037	426.612
T2DM	1	29024956	rs10915188	G	A	0.415	-0.029	0.005	3.69e-10	0.000408433	425.981
T2DM	15	67260238	rs1874832	G	A	0.168	0.038	0.007	3.22e-09	0.000408127	425.662
T2DM	1	149894355	rs72692805	G	A	0.924	0.054	0.009	6.01e-10	0.000406059	423.504
T2DM	16	20392415	rs62034975	G	C	0.7	-0.031	0.005	6.6e-10	0.000403697	421.039
T2DM	3	183738626	rs2313211	T	A	0.448	0.029	0.005	4.06e-10	0.000401783	419.042
T2DM	2	18721662	rs7558413	G	A	0.431	-0.029	0.005	6.44e-10	0.000401078	418.307
T2DM	22	38572526	rs133015	G	C	0.44	-0.029	0.005	5.18e-10	0.000400277	417.471
T2DM	1	177899121	rs545608	G	C	0.802	-0.036	0.006	6.5e-10	0.000399636	416.802
T2DM	8	25872634	rs17818197	G	A	0.212	0.035	0.006	5e-10	0.000399572	416.735
T2DM	8	105661926	rs34340810	G	C	0.927	0.054	0.009	4.08e-10	0.000399515	416.676
T2DM	15	68080886	rs4776970	T	A	0.362	-0.029	0.005	6.14e-10	0.000399163	416.309
T2DM	15	83461873	rs36111056	G	A	0.78	0.034	0.006	1.97e-09	0.000398816	415.947
T2DM	17	29637308	rs12602834	G	A	0.391	0.029	0.005	7.1e-10	0.000397832	414.92
T2DM	4	140906390	rs12505942	C	T	0.339	-0.03	0.005	7.03e-10	0.000397696	414.778
T2DM	10	77647107	rs7099048	G	A	0.496	-0.028	0.005	8.93e-10	0.000397599	414.677
T2DM	9	126586563	rs1752169	C	A	0.731	-0.032	0.005	1.64e-09	0.000395665	412.659
T2DM	5	36084426	rs114136102	C	T	0.04	0.072	0.012	2.05e-09	0.000395269	412.246
T2DM	16	28917644	rs7188071	C	T	0.637	-0.029	0.005	1.33e-09	0.000394547	411.492
T2DM	2	228973660	rs7561798	G	A	0.485	0.028	0.005	1.16e-09	0.000394459	411.401
T2DM	15	57333416	rs2435907	G	A	0.411	-0.029	0.005	1.32e-09	0.000393315	410.207
T2DM	17	75386909	rs1656794	G	A	0.716	0.031	0.005	3.58e-09	0.000393185	410.072
T2DM	17	70645032	rs61736066	G	A	0.917	0.051	0.009	2.08e-09	0.000391877	408.707
T2DM	12	132544694	rs11830243	C	T	0.887	-0.044	0.007	2.1e-09	0.000391631	408.45
T2DM	10	104548393	rs2250301	G	A	0.748	0.032	0.005	1.27e-09	0.000390778	407.56
T2DM	4	89751858	rs7660000	C	T	0.713	0.031	0.005	1.29e-09	0.000390686	407.464
T2DM	11	61565908	rs174541	C	T	0.354	-0.029	0.005	8.63e-10	0.00038997	406.717
T2DM	1	205789455	rs7538321	T	A	0.125	0.042	0.007	1.33e-09	0.000386668	403.273
T2DM	17	57407019	rs1451506	G	A	0.873	-0.042	0.008	2.78e-08	0.000385066	401.6
T2DM	21	47767295	rs75756987	G	C	0.888	0.044	0.007	1.61e-09	0.000384541	401.053
T2DM	7	69782073	rs2103132	G	C	0.749	-0.032	0.005	1.88e-09	0.000382619	399.048
T2DM	12	21781246	rs10841868	G	T	0.739	0.032	0.005	1.65e-09	0.000382389	398.807
T2DM	19	18834514	rs10404726	C	T	0.531	0.028	0.005	2.73e-09	0.000382217	398.629
T2DM	13	41688401	rs4397977	G	A	0.657	-0.029	0.005	3.05e-09	0.000381924	398.323
T2DM	2	175197545	rs12992995	C	A	0.732	0.031	0.005	2.46e-09	0.00038166	398.047
T2DM	8	19843171	rs17091891	C	T	0.123	-0.042	0.007	2.56e-09	0.000381314	397.686
T2DM	16	15153717	rs9927842	C	T	0.838	-0.038	0.007	6.84e-09	0.000381053	397.413
T2DM	5	67714246	rs4976033	G	A	0.411	0.028	0.005	1.93e-09	0.000379691	395.993
T2DM	1	67010654	rs4655617	C	A	0.434	0.028	0.005	2.45e-09	0.000377021	393.207
T2DM	16	968292	rs4984980	G	A	0.812	-0.035	0.006	3.79e-09	0.000376608	392.777
T2DM	3	54828827	rs76263492	G	T	0.957	-0.068	0.012	1.64e-08	0.000375821	391.459
T2DM	18	54675384	rs17684074	G	C	0.739	0.031	0.005	4.12e-09	0.000375605	391.73
T2DM	8	4186731	rs117173251	C	T	0.967	-0.077	0.014	2.48e-08	0.000375077	390.162
T2DM	16	88132199	rs11117364	G	A	0.666	0.029	0.005	7.71e-09	0.00037443	390.503
T2DM	2	208870017	rs34329895	G	A	0.603	-0.028	0.005	3.1e-09	0.000372817	388.821
T2DM	2	112795492	rs34589210	G	A	0.857	-0.039	0.007	6.89e-09	0.000372583	388.577
T2DM	2	179650954	rs6715901	G	A	0.512	0.027	0.005	3.06e-09	0.000372444	388.432
T2DM	14	103860309	rs12890750	G	T	0.639	0.028	0.005	2.84e-09	0.000372023	387.993
T2DM	1	64107284	rs2269247	C	T	0.814	0.035	0.006	5.74e-09	0.000371708	387.664
T2DM	4	145621328	rs75686861	G	A	0.907	-0.047	0.008	4.16e-09	0.000371079	387.007
T2DM	7	103444978	rs39328	C	T	0.573	-0.028	0.005	3.29e-09	0.000369999	385.88
T2DM	6	126052359	rs2008027	G	A	0.504	0.027	0.005	4.28e-09	0.000369893	385.77
T2DM	1	172361032	rs4916253	G	T	0.431	0.027	0.005	3.09e-09	0.000368252	384.058
T2DM	18	13271367	rs11662800	G	A	0.582	-0.028	0.005	2.42e-09	0.000368054	383.851
T2DM	9	116943357	rs1431819	G	A	0.689	0.029	0.005	6.33e-09	0.000368042	383.84
T2DM	6	33542523	rs9296095	C	T	0.197	-0.034	0.006	4.75e-09	0.000367892	383.683
T2DM	17	27566326	rs7220340	G	A	0.545	-0.027	0.005	4e-09	0.000366924	382.672
T2DM	22	29805444	rs75401573	C	T	0.924	0.051	0.009	6.47e-09	0.00036541	381.093
T2DM	17	77895311	rs9912236	C	T	0.75	0.031	0.006	1.56e-08	0.000364943	379.616
T2DM	2	147920213	rs7559658	C	T	0.19	0.034	0.006	3.17e-09	0.000364091	379.717
T2DM	7	18331915	rs583769	G	A	0.749	-0.031	0.005	2.69e-09	0.000363862	379.478
T2DM	5	87705268	rs2410767	G	C	0.221	-0.033	0.006	6.79e-09	0.000363804	379.417
T2DM	9	23362311	rs11793831	G	T	0.595	-0.027	0.005	4.21e-09	0.000361857	377.387
T2DM	4	77528821	rs11723275	C	A	0.467	0.027	0.005	4.26e-09	0.000360239	375.698
T2DM	1	65989878	rs10889560	C	A	0.912	-0.047	0.008	4.01e-09	0.000359849	375.291
T2DM	4	186580062	rs35901985	G	A	0.176	-0.035	0.006	1.69e-08	0.00035922	374.636
T2DM	1	20729451	rs10916784	G	C	0.585	0.027	0.005	3.91e-09	0.000359179	374.592
T2DM	14	47313541	rs2933211	G	A	0.499	-0.027	0.005	6.24e-09	0.000359119	374.529
T2DM	17	9787958	rs7219033	G	A	0.686	-0.029	0.005	4.94e-09	0.000357268	372.598
T2DM	10	65305252	rs12263348	C	T	0.662	-0.028	0.005	7.77e-09	0.000356137	371.418
T2DM	13	31036642	rs3742305	G	C	0.271	-0.03	0.005	1.51e-08	0.000355441	370.693
T2DM	9	97804641	rs7046845	C	A	0.09	-0.047	0.008	2.26e-08	0.00035524	370.483
T2DM	3	173119768	rs686998	G	A	0.539	0.027	0.005	6.11e-09	0.000354276	369.477
T2DM	8	14124809	rs17294565	C	A	0.381	0.027	0.005	4.74e-09	0.000354224	369.423
T2DM	2	100598726	rs34506349	G	A	0.96	0.068	0.012	1.76e-08	0.000353683	367.9
T2DM	1	147121000	rs79489938	G	A	0.986	0.113	0.021	4.79e-08	0.000353151	367.837
T2DM	7	2760750	rs798549	C	A	0.282	0.03	0.005	1.46e-08	0.000352409	367.53
T2DM	1	26868639	rs6685701	G	A	0.721	-0.03	0.005	1.14e-08	0.00035234	367.457
T2DM	15	39639171	rs11639470	G	C	0.453	-0.027	0.005	1.34e-08	0.000350667	365.712
T2DM	10	75599127	rs2675662	G	A	0.436	-0.027	0.005	8.3e-09	0.000350623	365.666
T2DM	6	111738793	rs55812705	C	T	0.251	-0.031	0.005	7.45e-09	0.000349679	364.682
T2DM	9	1039939	rs756145	G	A	0.691	-0.029	0.005	5.52e-09	0.000349487	364.481
T2DM	15	60938816	rs8033609	C	A	0.455	-0.027	0.005	1.11e-08	0.000348268	363.209
T2DM	7	48839003	rs12539264	G	A	0.282	0.029	0.005	6.62e-09	0.000347946	362.874
T2DM	11	76505202	rs10899283	C	T	0.771	0.031	0.006	1.46e-08	0.000347946	362.874
T2DM	7	4683258	rs62450857	G	A	0.867	-0.039	0.007	1.85e-08	0.000346967	361.851
T2DM	7	40816653	rs17439448	C	T	0.879	-0.04	0.007	2.98e-08	0.0003462	361.051
T2DM	4	3241845	rs362307	C	T	0.925	-0.05	0.009	3.77e-08	0.000345912	360.751
T2DM	7	13900325	rs1122518	C	T	0.473	0.026	0.005	1.25e-08	0.000344822	359.614
T2DM	3	35667761	rs10490871	G	A	0.369	0.027	0.005	6.58e-09	0.000344682	359.468
T2DM	19	31835516	rs4805681	C	T	0.61	0.027	0.005	1.32e-08	0.000344262	359.03
T2DM	1	112292303	rs197379	C	T	0.387	0.027	0.005	9.14e-09	0.000343325	358.053
T2DM	3	131644937	rs1225052	G	A	0.371	0.027	0.005	1e-08	0.000342573	357.267
T2DM	17	481604	rs11870735	C	T	0.818	-0.034	0.006	1.68e-08	0.000342472	357.162
T2DM	12	54541750	rs1872635	G	A	0.314	-0.028	0.005	1.28e-08	0.000342359	357.044
T2DM	7	74108135	rs67755137	G	A	0.81	-0.033	0.006	2.24e-08	0.000341591	355.769
T2DM	5	133864599	rs329122	G	A	0.573	-0.026	0.005	1.25e-08	0.000341072	355.702
T2DM	3	72813582	rs11922794	G	C	0.749	-0.03	0.005	1.46e-08	0.000340297	354.893
T2DM	1	11306279	rs4845987	G	C	0.309	-0.028	0.005	2.78e-08	0.000339294	353.846
T2DM	17	7531965	rs858519	C	T	0.556	-0.026	0.005	1.88e-08	0.000338976	353.515
T2DM	6	131954797	rs7739842	G	T	0.194	0.033	0.006	1.98e-08	0.000338367	352.88
T2DM	3	86831077	rs1437055	C	A	0.387	-0.027	0.005	1.19e-08	0.000338304	352.814
T2DM	5	50145266	rs152839	C	T	0.576	0.026	0.005	1.25e-08	0.000337834	352.323
T2DM	14	69526307	rs4899280	C	T	0.67	-0.028	0.005	1.02e-08	0.00033685	351.298
T2DM	3	36870230	rs11129735	G	A	0.538	-0.026	0.005	1.53e-08	0.000336017	350.428
T2DM	22	32348841	rs117001013	C	T	0.919	0.047	0.008	1.44e-08	0.000335999	350.409
T2DM	20	39832628	rs17265513	C	T	0.198	0.033	0.006	1.13e-08	0.000335584	349.977
T2DM	4	91243865	rs7656001	G	A	0.45	-0.026	0.005	1.23e-08	0.000334606	348.957
T2DM	6	19718157	rs9368112	C	T	0.475	-0.026	0.005	2.69e-08	0.000334586	348.936
T2DM	10	88124501	rs11201999	C	T	0.537	0.026	0.005	1.25e-08	0.000333578	347.884
T2DM	18	40063830	rs346240	G	A	0.223	0.031	0.006	3.62e-08	0.000333133	347.42
T2DM	3	71656045	rs844215	C	T	0.587	0.026	0.005	2.04e-08	0.0003329	347.177
T2DM	12	31367856	rs10771813	C	A	0.544	0.026	0.005	2.6e-08	0.000332784	347.055
T2DM	2	212302573	rs13005841	T	A	0.287	-0.029	0.005	1.89e-08	0.000332423	346.679
T2DM	13	28245127	rs9319382	C	T	0.679	0.028	0.005	2.87e-08	0.000332283	346.533
T2DM	2	213835977	rs17354348	G	A	0.258	-0.029	0.005	2.99e-08	0.00033119	345.393
T2DM	8	22477778	rs1059592	G	A	0.646	-0.027	0.005	2.4e-08	0.000330829	345.016
T2DM	12	6681786	rs67013744	G	A	0.16	0.035	0.006	4.11e-08	0.000329946	344.095
T2DM	16	85716463	rs11646052	G	A	0.392	0.026	0.005	2.61e-08	0.000329649	343.785
T2DM	6	15475051	rs727734	T	A	0.253	-0.03	0.005	3.06e-08	0.000328508	342.595
T2DM	14	77300863	rs2056857	C	T	0.594	0.026	0.005	2.59e-08	0.000328464	342.549
T2DM	2	67878328	rs1430780	C	T	0.677	-0.027	0.005	3.35e-08	0.000325947	339.923
T2DM	4	20210953	rs11940813	G	A	0.137	0.037	0.007	2.65e-08	0.000325469	339.424
T2DM	4	129179458	rs12509379	G	T	0.788	-0.031	0.006	2.66e-08	0.000324901	338.832
T2DM	7	89880949	rs10240790	G	A	0.704	0.028	0.005	4.69e-08	0.000324226	338.127
T2DM	1	154294260	rs1194606	C	T	0.233	0.03	0.006	3.41e-08	0.000324215	338.116
T2DM	2	105148418	rs17624303	C	T	0.725	0.029	0.005	4.88e-08	0.000324104	338
T2DM	22	41593873	rs5751061	G	T	0.614	0.026	0.005	3.15e-08	0.000322775	336.613
T2DM	3	53127677	rs2581787	G	T	0.442	-0.025	0.005	3.14e-08	0.000318254	331.898
T2DM	14	58797953	rs10137475	G	A	0.426	0.026	0.005	4.43e-08	0.000317946	331.576
T2DM	14	29744532	rs8005994	G	A	0.346	-0.027	0.005	4.52e-08	0.000317599	331.214
T2DM	17	4839149	rs2243102	C	T	0.422	0.026	0.005	4.94e-08	0.000317294	330.896
T2DM	17	34842521	rs4796224	G	A	0.474	0.025	0.005	2.71e-08	0.000316648	330.222
T2DM	7	50581972	rs2876826	G	A	0.215	0.031	0.006	3.33e-08	0.000316388	329.951
T2DM	15	36392562	rs11073147	G	A	0.54	0.025	0.005	4.26e-08	0.000315528	329.054
T2DM	8	57483013	rs62515938	C	T	0.74	-0.029	0.005	2.97e-08	0.000315143	328.652
T2DM	11	74625997	rs480840	C	T	0.423	0.025	0.005	4.46e-08	0.000314969	328.471
T2DM	10	89768584	rs10788575	G	A	0.851	-0.035	0.006	3.72e-08	0.00031387	327.324
T2DM	4	137094048	rs1724557	C	A	0.418	0.025	0.005	4.73e-08	0.000313798	327.249
T2DM	10	34018730	rs36051838	C	T	0.089	0.044	0.008	4.54e-08	0.000313301	326.731
T2DM	6	41012405	rs4714422	G	A	0.239	0.029	0.005	4.81e-08	0.000312014	325.388
T2DM	11	64031241	rs35169799	C	T	0.934	-0.05	0.009	4.79e-08	0.000311848	324.781
T2DM	20	51621922	rs2252221	G	A	0.531	0.025	0.005	4.48e-08	0.000306307	319.435
T2DM	6	51505337	rs1819564	T	A	0.973	-0.076	0.014	3.85e-08	0.000304343	316.984

## Sheet: TableS2
Supplementary Table 2. Information of included studies and consortia
Exposure/Outcome	Consortium or cohort study	Participants	Web source if publicly available
FI, FG, 2hGlu, HbA1	MAGIC consortium	281 416 individuals (30% non-European ancestry)	https://magicinvestigators.org/downloads/
T2DM	Marijana Vujkovic et al	228 499 T2DM cases and 1 178 783 controls (multi-ethnic)	https://pubmed.ncbi.nlm.nih.gov/32541925/
Endometrial cancer	13 studies of endometrial cancer and the E2C2 consortium	12 906 cancer cases and 108 979 controls of European ancestry	http://ftp.ebi.ac.uk/pub/databases/gwas/summary_statistics/GCST006001-GCST007000/GCST006464/
Breast cancer	The Breast Cancer Association Consortium (BCAC)	228 951 European-descent individuals, including 122 977 all breast cancer cases (69 501 ER+ and 21 468 ER-) and 105 974 controls	http://bcac.ccge.medschl.cam.ac.uk/
Colorectal cancer	Meta-GWAS of 11 previous CRC GWAS	20 049 cancer cases and 22 661 controls of European ancestry	https://pubmed.ncbi.nlm.nih.gov/32638365/
Cervix cancer	The UKB and GERA	6563 cancer cases and 410 350 controls of European ancestry	http://ftp.ebi.ac.uk/pub/databases/gwas/summary_statistics/GCST90011001-GCST90012000/GCST90011816/
Pancreatic cancer	The UKB and GERA	663 cancer cases and 410 350 controls of European ancestry	http://ftp.ebi.ac.uk/pub/databases/gwas/summary_statistics/GCST90011001-GCST90012000/GCST90011815/
Ovarian cancer	The Ovarian Cancer Association Consortium (OCAC)	25 509 cancer cases and 40 941 controls of European ancestry	https://gwas.mrcieu.ac.uk/datasets/ieu-a-1120/
Lung cancer	ILCCO	11 348 cancer cases and 15 861 controls of European ancestry	https://gwas.mrcieu.ac.uk/datasets/ieu-a-966/
Lymphoid leukaemia	Finngen	663 cancer cases and 218 129 controls of European ancestry	https://storage.googleapis.com/finngen-public-data-r5/summary_stats/finngen_R5_CD2_LYMPHOID_LEUKAEMIA.gz
Bladder cancer	The UKB and GERA	2242 cancer cases and 410 350 controls of European ancestry	http://ftp.ebi.ac.uk/pub/databases/gwas/summary_statistics/GCST90011001-GCST90012000/GCST90011817/
Non-Hodgkin lymphoma	The UKB and GERA	2400 cancer cases and 410 350 controls of European ancestry	http://ftp.ebi.ac.uk/pub/databases/gwas/summary_statistics/GCST90011001-GCST90012000/GCST90011819/
Multiple myeloma and malignant plasma cell neoplasms	Finngen	598 cancer cases and 218 194 controls of European ancestry	https://storage.googleapis.com/finngen-public-data-r5/summary_stats/finngen_R5_CD2_MULTIPLE_MYELOMA_PLASMA_CELL.gz
Melanoma	The UKB and GERA	6777 cancer cases and 410 350 controls of European ancestry	http://ftp.ebi.ac.uk/pub/databases/gwas/summary_statistics/GCST90011001-GCST90012000/GCST90011809/
Brain cancer	Finngen	464 cancer cases and 218 328 controls of European ancestry	https://storage.googleapis.com/finngen-public-data-r5/summary_stats/finngen_R5_C3_BRAIN.gz
Esophagus/ stomach cancer	The UKB and GERA	1091 cancer cases and 410 350 controls of European ancestry	http://ftp.ebi.ac.uk/pub/databases/gwas/summary_statistics/GCST90011001-GCST90012000/GCST90011807/
Rectum cancer	The UKB and GERA	2091 cancer cases and 410 350 controls of European ancestry	http://ftp.ebi.ac.uk/pub/databases/gwas/summary_statistics/GCST90011001-GCST90012000/GCST90011810/
Overall cancer	Finngen	38036 cancer cases and 180 756 controls of European ancestry	https://storage.googleapis.com/finngen-public-data-r5/summary_stats/finngen_R5_C3_CANCER.gz

## Sheet: Table S3
Supplementary Table 3. The SNP used for constructing polygenic risk score for fasting insulin
SNP	Trait	Chr	Pos..bp.	Effect.Allele	Other.Allele	Closest.Gene	EAF	Effect	SE	P.value	GCTA.Pvalue	R2	F
rs116141873	FI	6	34222201	T	G	C6orf1	0.0399	0.0428	0.0059	1.42e-11	3.29e-11	0.000140348	39.5018
rs11708067	FI	3	123065778	A	G	ADCY5	0.7816	-0.0135	0.0023	1.3e-09	1.52e-09	6.22e-05	17.511
rs11727676	FI	4	145659064	T	C	HHIP	0.9127	-0.0203	0.0039	2.9e-08	2.53e-08	6.57e-05	18.4817
rs118164457	FI	10	89680631	T	C	PTEN	0.957	-0.0345	0.0057	3.86e-10	3.95e-10	9.8e-05	27.5702
rs1206760	FI	20	45582472	A	G	EYA2	0.5447	-0.0112	0.0019	8.82e-10	1.23e-09	6.22e-05	17.5104
rs12454712	FI	18	60845884	T	C	BCL2	0.5804	0.0142	0.0025	1.78e-09	1.98e-09	9.82e-05	27.6415
rs1260326	FI	2	27730940	T	C	GCKR	0.3928	-0.0231	0.0019	8.42e-38	3.31e-37	0.000254541	71.6501
rs13258890	FI	8	23615445	T	C	NKX2-6	0.7651	0.0128	0.0025	2.77e-08	3.03e-08	5.89e-05	16.5739
rs13389219	FI	2	165528876	T	C	COBLL1	0.392	-0.0199	0.0019	5.84e-28	3.11e-12	0.000188767	53.132
rs1351394	FI	12	66351826	T	C	HMGA2	0.4943	-0.0111	0.0018	2.71e-09	3.7e-09	6.16e-05	17.3354
rs1474696	FI	6	127449246	A	G	RSPO3	0.4863	-0.0147	0.0018	3.02e-16	5.43e-16	0.000107964	30.386
rs17331151	FI	3	52844534	T	C	ITIH3	0.1084	-0.0162	0.0031	1.52e-08	1.46e-08	5.07e-05	14.2768
rs2108349	FI	7	50786663	A	G	GRB10	0.655	-0.0115	0.002	1.13e-08	1.4e-08	5.98e-05	16.8213
rs2780215	FI	6	34236973	A	G	RPS10-NUDT3; NUDT3	0.9555	0.0392	0.0063	1.06e-09	2.7e-09	0.000130675	36.7789
rs2845885	FI	11	63869062	T	C	MACROD1	0.9342	-0.0204	0.0039	1.18e-08	9.97e-09	5.12e-05	14.3988
rs2943646	FI	2	227099534	A	G	LOC646736	0.3706	-0.025	0.0019	8.47e-39	3.46e-38	0.00029157	82.0763
rs35000407	FI	3	12351521	T	G	PPARG	0.863	0.0258	0.0028	1.5e-21	2.12e-18	0.000157399	44.3014
rs3775380	FI	4	89739808	A	G	FAM13A	0.5048	-0.0119	0.0018	1.48e-11	2.21e-11	7.08e-05	19.9252
rs459193	FI	5	55806751	A	G	LOC101928448	0.2666	-0.0181	0.0021	1.12e-18	5.21e-22	0.000128112	36.0573
rs4865796	FI	5	53272664	A	G	ARL15	0.6807	0.0165	0.002	7.33e-17	1.52e-16	0.000118346	33.3083
rs62271373	FI	3	150066540	A	T	LINC01214	0.0607	0.0256	0.0048	1.6e-08	1.78e-08	7.47e-05	21.0322
rs6487237	FI	12	21699928	A	C	GYS2	0.7785	0.0154	0.0026	4.68e-09	5.05e-09	8.18e-05	23.0191
rs6674544	FI	1	219628973	A	G	LYPLAL1	0.57	0.0177	0.002	6.97e-21	1.43e-20	0.000153575	43.225
rs6855363	FI	4	157670537	T	C	PDGFC	0.6811	0.0125	0.002	4.04e-08	4.98e-08	6.79e-05	19.1027
rs7012814	FI	8	9173358	A	G	LOC157273	0.4758	-0.0219	0.0019	8.34e-30	6.18e-11	0.000239243	67.343
rs7133378	FI	12	124409502	A	G	DNAH10	0.3165	-0.0127	0.002	6e-11	8.06e-11	6.98e-05	19.6394
rs73013411	FI	6	164126233	A	C	QKI	0.1282	-0.018	0.0032	2.08e-08	1.97e-08	7.24e-05	20.3826
rs731839	FI	19	33899065	A	G	PEPD	0.664	-0.0121	0.0019	3.87e-11	5.37e-11	6.53e-05	18.3859
rs75179845	FI	9	136132954	T	C	ABO	0.9064	-0.0216	0.0035	6.05e-11	5.28e-11	7.92e-05	22.2801
rs7903146	FI	10	114758349	T	C	TCF7L2	0.2717	-0.0116	0.0021	1.24e-09	1.5e-09	5.33e-05	14.9871
rs860598	FI	12	102898446	A	G	IGF1	0.8197	0.0177	0.0025	6.88e-12	1.25e-14	9.26e-05	26.0625
rs9472135	FI	6	43809802	T	C	LINC01512	0.7008	0.011	0.0022	4.21e-08	1.95e-08	5.07e-05	14.2804
rs972283	FI	7	130466854	A	G	KLF14	0.4739	-0.0105	0.0019	1.09e-08	1.46e-08	5.5e-05	15.4716
rs9819511	FI	3	49884261	T	C	TRAIP	0.2962	0.0137	0.0022	2.26e-08	-	7.83e-05	22.0236
rs9884482	FI	4	106081636	T	C	TET2	0.6099	-0.0125	0.0019	2.88e-11	4.13e-11	7.44e-05	20.925
rs998584	FI	6	43757896	A	C	VEGFA	0.485	0.0123	0.0019	2.31e-10	1.17e-10	7.56e-05	21.2702

## Sheet: Table S4
Supplementary Table 4. MR-PRESSO results of fasting insulin and cancers.
Cancer type	No. of SNP	Outlier	Global test. P value	Distortion test. P value	MR analysis	Beta	SE	P Value
Bladder	35	0	0.19	NA	Raw	0.27	0.4	0.498
					Outlier-corrected	NA	NA	NA
Brain	34	0	0.137	NA	Raw	1.24	0.92	0.186
					Outlier-corrected	NA	NA	NA
Breast	22	5	<0.001	0.265	Raw	-0.15	0.22	0.495
					Outlier-corrected	-0.09	0.16	0.595
Cervix	35	0	0.78	NA	Raw	0.14	0.19	0.474
					Outlier-corrected	NA	NA	NA
Colorectal	35	0	0.08	NA	Raw	0.65	0.21	0.004
					Outlier-corrected	NA	NA	NA
Endometrial	35	1	0.012	0.727	Raw	0.62	0.23	0.012
					Outlier-corrected	0.71	0.21	0.002
Esophagus/Stomach	35	0	0.48	NA	Raw	-0.11	0.52	0.833
					Outlier-corrected	NA	NA	NA
Lung	34	0	0.13	NA	Raw	0.23	0.25	0.361
					Outlier-corrected	NA	NA	NA
Lymphoid leukaemia	34	0	0.644	NA	Raw	0.63	0.63	0.328
					Outlier-corrected	NA	NA	NA
Melanoma	35	0	0.032	NA	Raw	0.04	0.26	0.881
					Outlier-corrected	NA	NA	NA
Multiple myeloma	34	0	0.09	NA	Raw	-0.61	0.82	0.464
					Outlier-corrected	NA	NA	NA
Non-Hodgkin lymphoma	35	0	0.345	NA	Raw	-0.29	0.37	0.438
					Outlier-corrected	NA	NA	NA
Ovarian	31	0	0.63	NA	Raw	0.14	0.16	0.373
					Outlier-corrected	NA	NA	NA
Pancreatic	35	0	0.193	NA	Raw	0.27	0.73	0.716
					Outlier-corrected	NA	NA	NA
Rectum	35	0	0.242	NA	Raw	0.31	0.4	0.439
					Outlier-corrected	NA	NA	NA
Overall	34	0	0.16	NA	Raw	-0.01	0.12	0.956
					Outlier-corrected	NA	NA	NA

## Sheet: Table S5
Supplementary Table 5. MR results of fasting insulin and cancers.
cancer type	N of SNPs	methods	OR(95%CI)	P_effect	P_heterogeneity	P_intercept
bladder	35	MR Egger	3.25 (0.25, 43.08)	0.376172	0.149	0.473
		Weighted median	1.46 (0.49, 4.34)	0.499519
		IVW	1.32 (0.59, 2.94)	0.50314	0.161
		Simple mode	4.33 (0.30, 63.06)	0.291195
		Weighted mode	4.94 (0.54, 44.94)	0.165268
brain	34	MR Egger	34.99 (0.08, 14587.42)	0.256628	0.111	0.419
		Weighted median	12.35 (1.14, 134.46)	0.0390034
		IVW	3.17 (0.51, 19.68)	0.215403	0.116
		Simple mode	14.31 (0.07, 2744.80)	0.328405
		Weighted mode	24.60 (0.65, 935.45)	0.0937934
cervix	35	MR Egger	1.09 (0.28, 4.25)	0.901761	0.764	0.897
		Weighted median	1.14 (0.62, 2.09)	0.677283
		IVW	1.19 (0.78, 1.81)	0.425205	0.801
		Simple mode	1.11 (0.31, 3.95)	0.868433
		Weighted mode	1.20 (0.42, 3.47)	0.735108
breast	22	MR Egger	0.87 (0.17, 4.49)	0.86543	< 0.001	0.965
		Weighted median	0.93 (0.67, 1.29)	0.660153
		IVW	0.90 (0.57, 1.41)	0.638879	< 0.001
		Simple mode	0.73 (0.39, 1.38)	0.341805
		Weighted mode	0.97 (0.61, 1.55)	0.903674
CRC	35	MR Egger	2.61 (0.67, 10.21)	0.176615	0.056	0.616
		Weighted median	2.05 (1.19, 3.52)	0.00915251
		IVW	1.87 (1.23, 2.84)	0.00335726	0.066
		Simple mode	2.52 (0.91, 6.98)	0.0840661
		Weighted mode	2.18 (0.89, 5.33)	0.0975237
Esophagus stomach	35	MR Egger	0.22 (0.01, 6.35)	0.382287	0.406	0.402
		Weighted median	0.88 (0.20, 3.89)	0.861712
		IVW	0.87 (0.31, 2.48)	0.797928	0.419
		Simple mode	0.38 (0.02, 6.48)	0.506364
		Weighted mode	0.98 (0.09, 11.01)	0.989294
kidney	35	MR Egger	1.09 (0.04, 28.32)	0.958075	0.212	0.295
		Weighted median	2.58 (0.61, 10.89)	0.196377
		IVW	5.84 (2.11, 16.19)	0.00068218	0.205
		Simple mode	23.65 (1.00, 557.78)	0.0580539
		Weighted mode	0.87 (0.06, 12.52)	0.920011
lung	34	MR Egger	1.14 (0.24, 5.36)	0.87283	0.078	0.88
		Weighted median	1.40 (0.74, 2.64)	0.301433
		IVW	1.27 (0.78, 2.09)	0.337758	0.096
		Simple mode	1.52 (0.43, 5.33)	0.516471
		Weighted mode	1.46 (0.58, 3.69)	0.431304
Lymphoid leukaemia	34	MR Egger	0.06 (0, 4.66)	0.21112	0.731	0.108
		Weighted median	2.90 (0.40, 20.81)	0.289889
		IVW	1.97 (0.52, 7.51)	0.32236	0.644
		Simple mode	12.99 (0.11, 1469.46)	0.29564
		Weighted mode	16.67 (0.09, 3104.37)	0.299122
Melanoma	35	MR Egger	1.42 (0.27, 7.56)	0.681036	0.019	0.698
		Weighted median	0.82 (0.43, 1.58)	0.559989
		IVW	1.04 (0.62, 1.74)	0.890721	0.024
		Simple mode	0.64 (0.16, 2.56)	0.531465
		Weighted mode	0.67 (0.25, 1.84)	0.445816
Multiple myeloma	34	MR Egger	3.20 (0.01, 692.51)	0.674889	0.093	0.481
		Weighted median	0.62 (0.07, 5.19)	0.662152
		IVW	0.50 (0.10, 2.51)	0.396408	0.101
		Simple mode	1.35 (0.02, 108.03)	0.894852
		Weighted mode	0.69 (0.01, 40.57)	0.857837
Non-Hodgkin	35	MR Egger	0.82 (0.08, 8.93)	0.871976	0.255	0.931
		Weighted median	0.68 (0.23, 1.95)	0.467503
		IVW	0.74 (0.36, 1.55)	0.425947	0.295
		Simple mode	0.67 (0.11, 4.05)	0.667563
		Weighted mode	0.65 (0.15, 2.75)	0.563655
ovarian	31	MR Egger	1.35 (0.51, 3.58)	0.554907	0.583	0.786
		Weighted median	1.32 (0.83, 2.09)	0.235409
		IVW	1.18 (0.86, 1.64)	0.308737	0.631
		Simple mode	1.78 (0.80, 3.98)	0.169023
		Weighted mode	1.47 (0.78, 2.77)	0.241351
overall cancer	34	MR Egger	1.20 (0.55, 2.63)	0.647057	0.172	0.654
		Weighted median	0.98 (0.71, 1.37)	0.918462
		IVW	1.01 (0.80, 1.28)	0.915788	0.197
		Simple mode	1.12 (0.58, 2.16)	0.739612
		Weighted mode	1.03 (0.55, 1.95)	0.917784
Pancreatic	35	MR Egger	1.92 (0.02, 220.75)	0.788641	0.135	0.871
		Weighted median	1.15 (0.16, 8.14)	0.890942
		IVW	1.32 (0.31, 5.73)	0.70891	0.161
		Simple mode	3.04 (0.04, 247.59)	0.623968
		Weighted mode	0.56 (0.02, 17.89)	0.744608
Rectum	35	MR Egger	2.85 (0.21, 38.09)	0.433344	0.217	0.582
		Weighted median	1.35 (0.44, 4.18)	0.599532
		IVW	1.42 (0.64, 3.15)	0.390213	0.241
		Simple mode	1.02 (0.13, 8.26)	0.985669
		Weighted mode	1.14 (0.20, 6.66)	0.882667
endometrial	35	MR Egger	4.57 (1.11, 18.79)	0.0427883	0.01	0.203
		Weighted median	2.27 (1.33, 3.86)	0.00247841
		IVW	1.89 (1.08, 3.01)	0.00770362	0.007
		Simple mode	2.86 (1.07, 7.66)	0.0436304
		Weighted mode	2.46 (1.00, 6.02)	0.0573379

## Sheet: Table S6
Supplementary Table 6. Multivariable MR analysis of T2DM and FI on endometrial cancer
Methods	exposure	outcome	nsnp	beta	se	p	OR	LCI	UCI
IVW	FI	EC	9	1.01074	0.277124	0.000265056	2.74764	1.59613	4.72991
	T2DM	EC	223	0.0364052	0.0299705	0.224481	1.03708	0.977911	1.09982
Residual	FI	EC	9	1.06595	0.272496	9.16059e-05	2.9036	1.7021	4.95325
	T2DM	EC	223	0.0718971	0.0279532	0.0101097	1.07454	1.01726	1.13506

## Sheet: Tabble S7
Supplementary Table 7. MR results of glecemic traits and T2DM on CRC and endometrial cancer
Exposure	Outcome	N of SNPs	methods	OR(95%CI)	P_effect
T2DM	FI	35	MR Egger	0.98 (0.95, 1.00)	0.0396193
			Weighted median	0.99 (0.98, 0.99)	0.000126356
			IVW	1.02 (1.01, 1.03)	0.000985502
			Simple mode	0.96 (0.95, 1.03)	0.477715
			Weighted mode	0.97 (0.96, 0.98)	3e-11
T2DM	EC	328	IVW	1.10 (1.04, 1.16)	<0.001
FI	EC	9	MVMR	2.75 (1.60, 4.73)	<0.001
	The proportion of MR mediation=beta1*beta2/beta=21.3%
	beta1: the effect of T2DM on FI
	beta2: the effect of FI on endometrial cancer in MVMR analysis
	beta: the effect of T2DM on endometrial cancer in two-sample MR analysis

## Sheet: Figure S1
Supplementary Figure 1. Sensitivity analysis of FI on cancers
		Scatter plot							Forest plot of singlesnp MR						Funnel plot						Leave-one-out analysis
	Bladder cancer
		Scatter plot							Forest plot of singlesnp MR						Funnel plot						Leave-one-out analysis
	Brain cancer
		Scatter plot							Forest plot of singlesnp MR						Funnel plot						Leave-one-out analysis
	Breast cancer
		Scatter plot							Forest plot of singlesnp MR						Funnel plot						Leave-one-out analysis
	Cervix cancer
		Scatter plot							Forest plot of singlesnp MR						Funnel plot						Leave-one-out analysis
	Colorectal cancer
		Scatter plot							Forest plot of singlesnp MR						Funnel plot						Leave-one-out analysis
	endometrial cancer
		Scatter plot							Forest plot of singlesnp MR						Funnel plot						Leave-one-out analysis
	Esophagus/stomach cancer
		Scatter plot							Forest plot of singlesnp MR						Funnel plot						Leave-one-out analysis
	Lung cancer
		Scatter plot							Forest plot of singlesnp MR						Funnel plot						Leave-one-out analysis
	Lymphoid leukaemia
		Scatter plot							Forest plot of singlesnp MR						Funnel plot						Leave-one-out analysis
	Melanoma cancer
		Scatter plot							Forest plot of singlesnp MR						Funnel plot						Leave-one-out analysis
	Multiple myeloma
		Scatter plot							Forest plot of singlesnp MR						Funnel plot						Leave-one-out analysis
	Non-Hodgkin
		Scatter plot							Forest plot of singlesnp MR						Funnel plot						Leave-one-out analysis
	Ovarian cancer
		Scatter plot							Forest plot of singlesnp MR						Funnel plot						Leave-one-out analysis
	Pancreatic cancer
		Scatter plot							Forest plot of singlesnp MR						Funnel plot						Leave-one-out analysis
	Overall cancer

## Sheet: Figure S2
Supplementary Figure 2. Sensitivity analysis of glycemic traits and T2DM on colorectal cancer
		Scatter plot							Forest plot of singlesnp MR						Funnel plot							Leave-one-out analysis
	FG
		Scatter plot							Forest plot of singlesnp MR						Funnel plot							Leave-one-out analysis
	HbA1
		Scatter plot							Forest plot of singlesnp MR						Funnel plot							Leave-one-out analysis
	2hGlu
		Scatter plot							Forest plot of singlesnp MR						Funnel plot							Leave-one-out analysis
	T2DM

## Sheet: Figure S3
Supplementary Figure 3. Sensitivity analysis of glycemic traits and T2DM on endometrial cancer
		Scatter plot						Forest plot of singlesnp MR						Funnel plot						Leave-one-out analysis
	FG
		Scatter plot						Forest plot of singlesnp MR						Funnel plot						Leave-one-out analysis
	HbA1
		Scatter plot						Forest plot of singlesnp MR						Funnel plot						Leave-one-out analysis
	2hGlu
		Scatter plot						Forest plot of singlesnp MR						Funnel plot						Leave-one-out analysis
	T2DM
